# Supplementary material
Source: PubMed Central journal article supplement (PMC2862265)
Supplement: NIHMS191942-supplement-1_si_001.pdf [file NIHMS191942-supplement-1_si_001.pdf]

Nuclear Resonance Vibrational Spectroscopy applied to [Fe(OEP)(NO)]:  
The Vibrational Assignments of Five-Coordinate Ferrous Heme Nitrosyls  
and Implications for Electronic Structure

**Nicolai Lehnert,\*<sup>1</sup> Mary Grace I. Galinato,<sup>1</sup> Florian Paulat,<sup>1</sup> George Richter-Addo,<sup>2</sup>  
Wolfgang Sturhahn,<sup>3</sup> Nan Xu,<sup>2</sup> Jiyong Zhao<sup>3</sup>**

<sup>1</sup> Department of Chemistry, University of Michigan, Ann Arbor, MI 48109, USA

<sup>2</sup> Department of Chemistry and Biochemistry, University of Oklahoma, Norman, OK 73019, USA

<sup>3</sup> Argonne National Laboratory, APS/XFD, 431/D003, Argonne, IL 60439

E-mail: [lehnertn@umich.edu](mailto:lehnertn@umich.edu)

## Supporting Information

**Complete ref. 28:**

Frisch, M. J.; Trucks, G. W.; Schlegel, H. B.; Scuseria, G. E.; Robb, M. A.; Cheeseman, J. R.; Montgomery, J. A., Jr.; Vreven, T.; Kudin, K. N.; Burant, J. C.; Millam, J. M.; Iyengar, S. S.; Tomasi, J.; Barone, V.; Mennucci, B.; Cossi, M.; Scalmani, G.; Rega, N.; Petersson, G. A.; Nakatsuji, H.; Hada, M.; Ehara, M.; Toyota, K.; Fukuda, R.; Hasegawa, J.; Ishida, M.; Nakajima, T.; Honda, Y.; Kitao, O.; Nakai, H.; Klene, M.; Li, X.; Knox, J. E.; Hratchian, H. P.; Cross, J. B.; Adamo, C.; Jaramillo, J.; Gomperts, R.; Stratmann, R. E.; Yazyev, O.; Austin, A. J.; Cammi, R.; Pomelli, C.; Ochterski, J. W.; Ayala, P. Y.; Morokuma, K.; Voth, G. A.; Salvador, P.; Dannenberg, J. J.; Zakrzewski, V. G.; Dapprich, S.; Daniels, A. D.; Strain, M. C.; Farkas, O.; Malick, D. K.; Rabuck, A. D.; Raghavachari, K.; Foresman, J. B.; Ortiz, J. V.; Cui, Q.; Baboul, A. G.; Clifford, S.; Cioslowski, J.; Stefanov, B. B.; Liu, G.; Liashenko, A.; Piskorz, P.; Komaromi, I.; Martin, R. L.; Fox, D. J.; Keith, T.; Al-Laham, M. A.; Peng, C. Y.; Nanayakkara, A.; Challacombe, M.; Gill, P. M. W.; Johnson, B.; Chen, W.; Wong, M. W.; Gonzalez, C.; Pople, J. A. *Gaussian 03*, Gaussian, Inc.: Pittsburgh, PA, 2003.

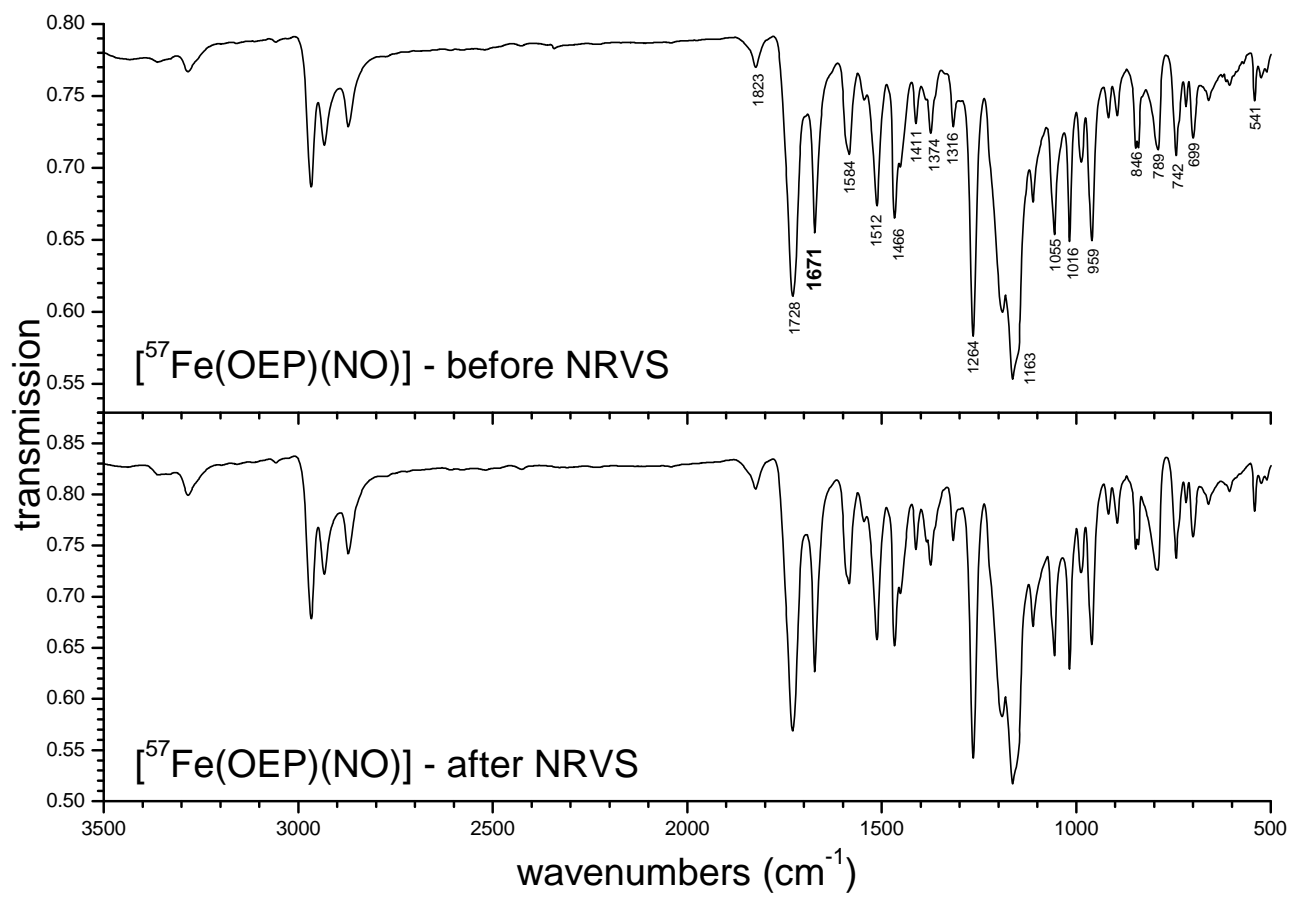

**Figure S1.** IR spectra of [<sup>57</sup>Fe(OEP)(NO)] (**1**) taken before (top) and after (bottom) the NRVS measurements. The spectra show no noticeable decomposition of the compound due to the exposure of the sample to the x-ray beam.

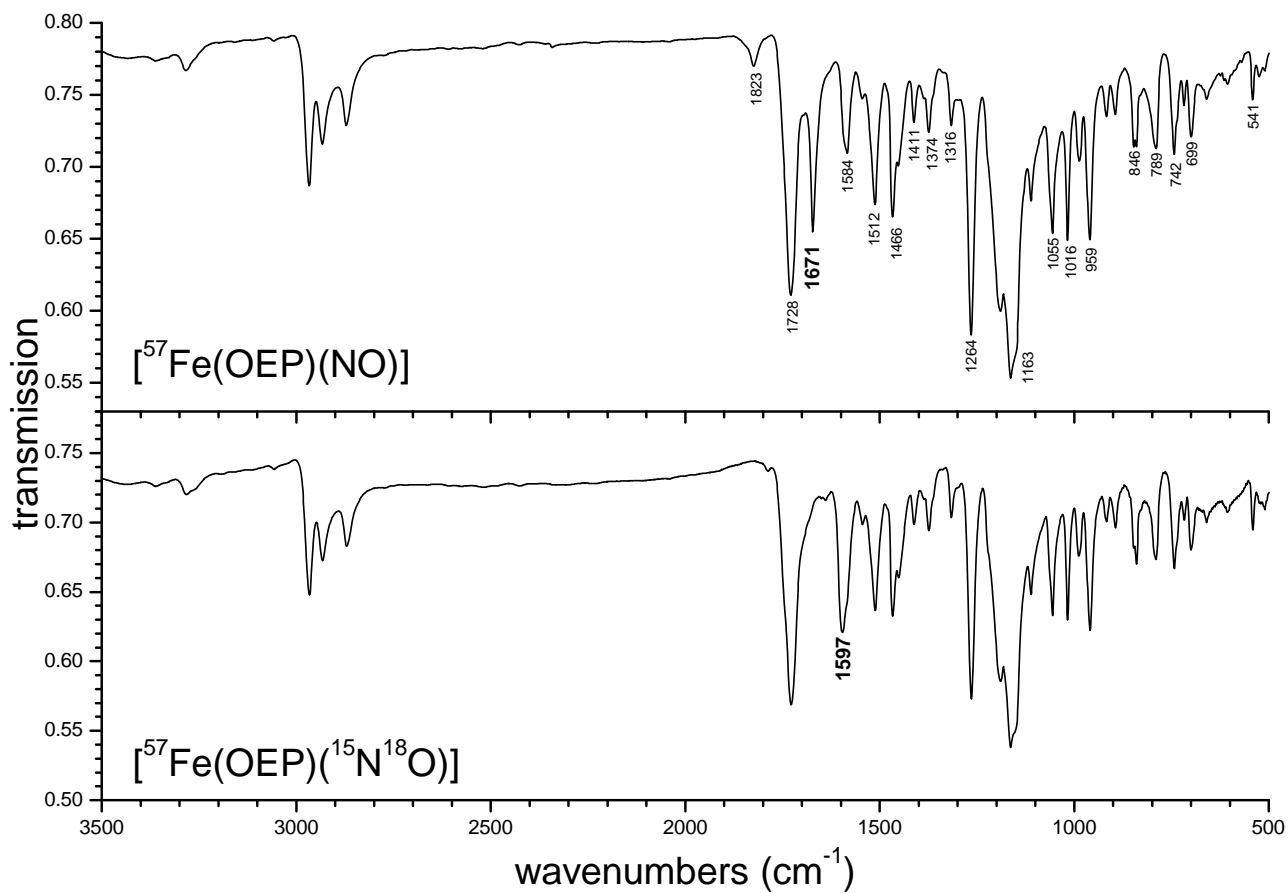

**Figure S2.** IR spectra of [<sup>57</sup>Fe(OEP)(NO)] (**1**) with natural abundance (top) and <sup>15</sup>N<sup>18</sup>O labeled (bottom) nitric oxide. The spectra show the N-O stretch  $\nu(\text{N-O})$  of **1** at 1671 cm<sup>-1</sup> which shifts to 1597 cm<sup>-1</sup> in the isotopically labeled compound.

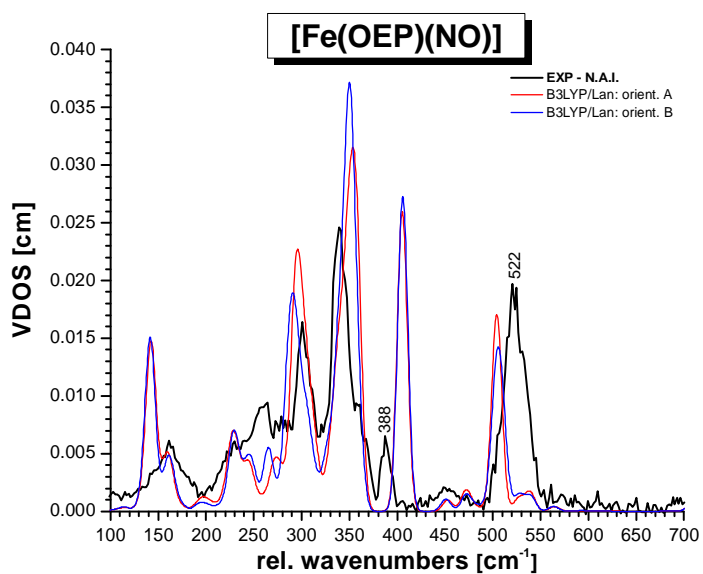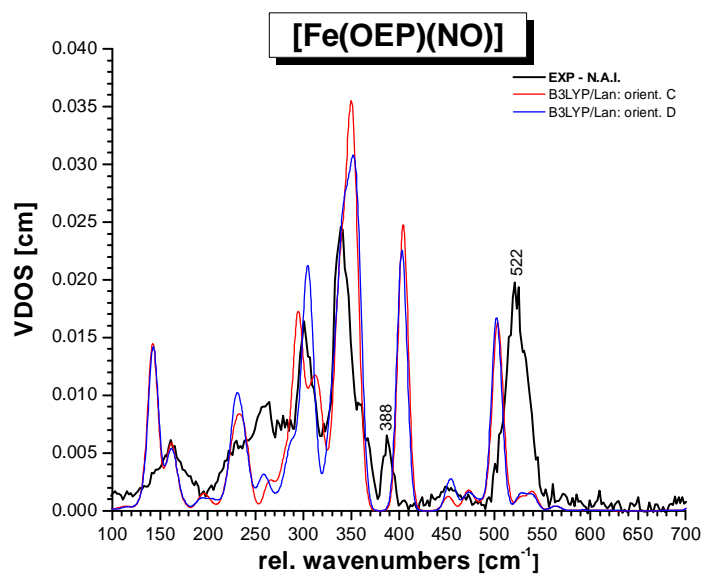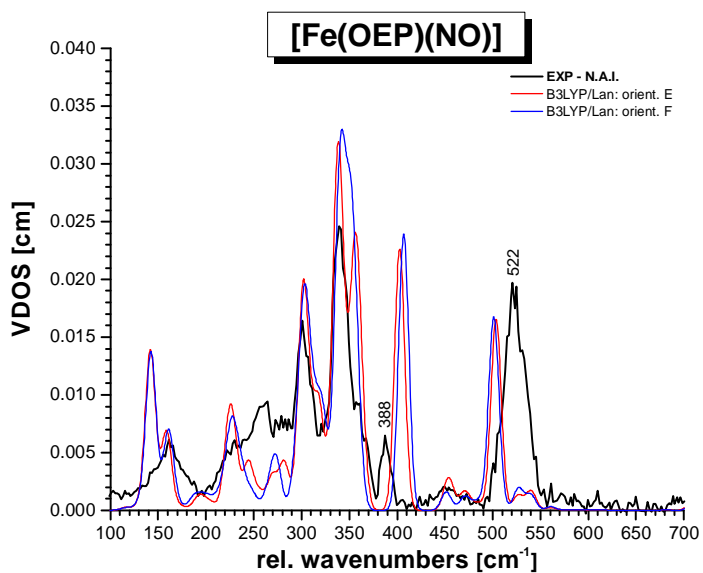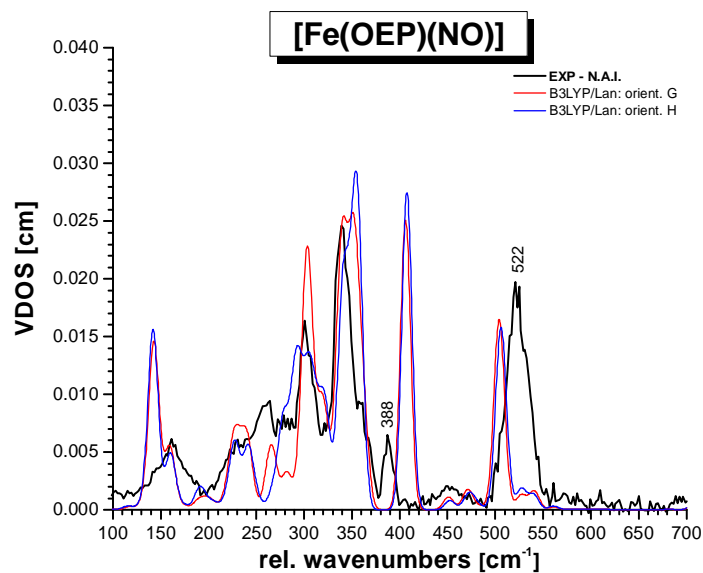

**Figure S3.** Calculated NRVS spectra of [Fe(OEP)(NO)] (**1**) for form **I** (5/3 structure) according to Figure 1 using B3LYP/LanL2DZ.

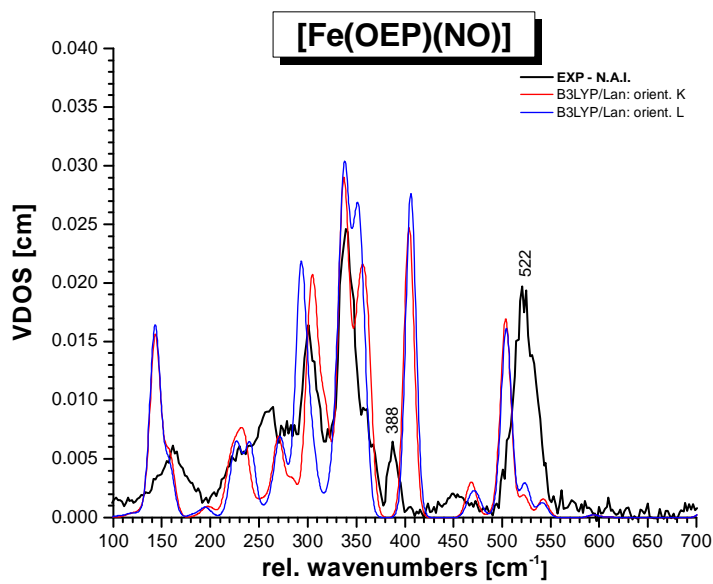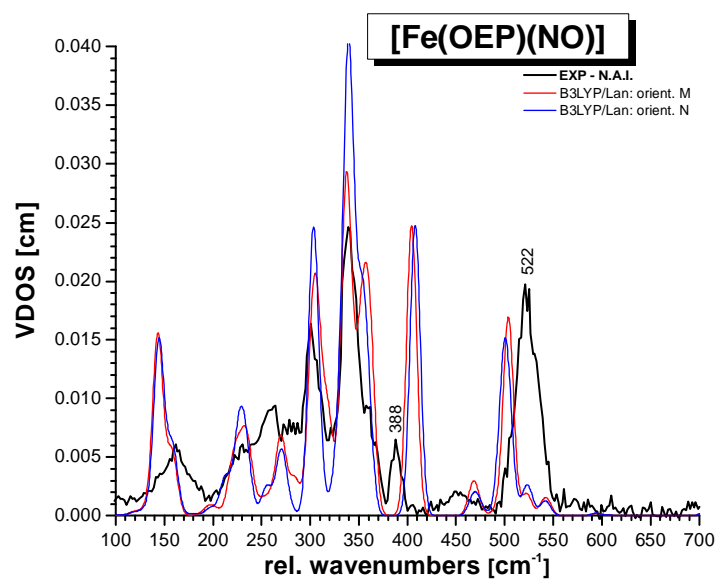

**Figure S4.** Calculated NRVS spectra of [Fe(OEP)(NO)] (**1**) for form **II** (4/4 structure) according to Figure 2 using B3LYP/LanL2DZ.

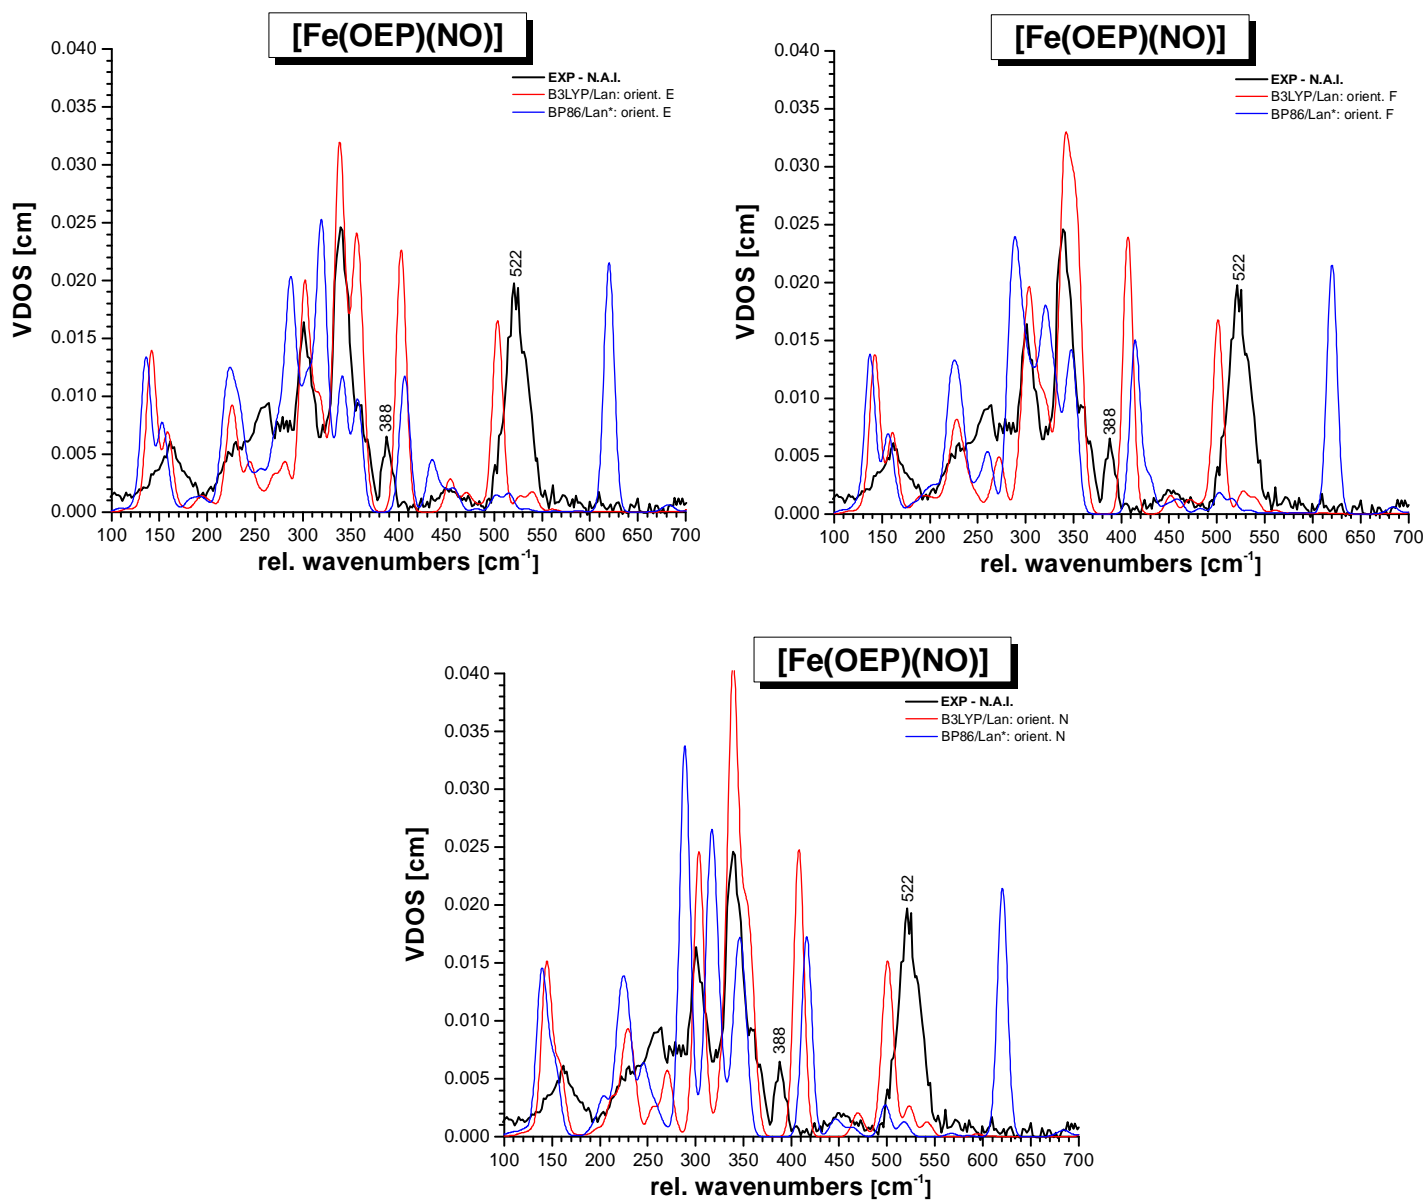

**Figure S5.** Calculated NRVS spectra of [Fe(OEP)(NO)] (**1**) for the selected conformers **1-E** (crystal structure form **I**), **1-F** (best fit of NRVS data with B3LYP/LanL2DZ), and **1-N** (crystal structure of form **II**) using B3LYP/LanL2DZ and BP86/LanL2DZ\* in comparison.

**Table S1.** Results of the B3LYP/LanL2DZ and BP86/LanL2DZ\* geometry optimization and frequency calculations for conformers A – H and K – N of [Fe(OEP)(NO)] (**1**).

| Conformer                             | Geometric Parameter <sup>a</sup> |        |        |                         | Vibrational Frequency [cm <sup>-1</sup> ] |          |           |
|---------------------------------------|----------------------------------|--------|--------|-------------------------|-------------------------------------------|----------|-----------|
|                                       | r(Fe-NO)                         | r(N-O) | Fe-N-O | r(Fe-N <sub>pyr</sub> ) | v(N-O)                                    | v(Fe-NO) | δ(Fe-N-O) |
| <b>B3LYP/LanL2DZ: conformation I</b>  |                                  |        |        |                         |                                           |          |           |
| A                                     | 1.742                            | 1.215  | 143    | 2.020                   | 1615                                      | 504      | 405       |
| B                                     | 1.742                            | 1.215  | 143    | 2.020                   | 1615                                      | 503/509  | 406       |
| C                                     | 1.742                            | 1.215  | 143    | 2.020                   | 1614                                      | 502/507  | 404       |
| D                                     | 1.742                            | 1.215  | 143    | 2.020                   | 1616                                      | 502      | 403       |
| E                                     | 1.742                            | 1.215  | 143    | 2.020                   | 1615                                      | 503      | 403       |
| F                                     | 1.742                            | 1.215  | 143    | 2.020                   | 1617                                      | 501      | 407       |
| G                                     | 1.742                            | 1.215  | 143    | 2.020                   | 1615                                      | 503/508  | 406       |
| H                                     | 1.742                            | 1.215  | 143    | 2.020                   | 1617                                      | 504/508  | 408       |
| <b>B3LYP/LanL2DZ: conformation II</b> |                                  |        |        |                         |                                           |          |           |
| K                                     | 1.742                            | 1.215  | 143    | 2.020                   | 1614                                      | 504      | 404       |
| L                                     | 1.742                            | 1.215  | 143    | 2.020                   | 1614                                      | 504      | 406       |
| M                                     | 1.742                            | 1.215  | 143    | 2.020                   | 1614                                      | 504      | 404       |
| N                                     | 1.742                            | 1.215  | 143    | 2.020                   | 1616                                      | 499/504  | 408       |
| <b>BP86/LanL2DZ*</b>                  |                                  |        |        |                         |                                           |          |           |
| F                                     | 1.687                            | 1.190  | 143    | 2.022                   | 1712                                      | 620      | 414       |
| E                                     | 1.687                            | 1.190  | 144    | 2.023                   | 1713                                      | 620      | 406       |
| N                                     | 1.687                            | 1.190  | 144    | 2.022                   | 1712                                      | 620      | 416       |

<sup>a</sup> Distances r in [Å] and angles in [degrees]; r(Fe-N<sub>pyr</sub>) is the average Fe-N(porphyrin) distance.



**Table S2.** Results of the QCC-NCA fits of conformers A – H and K – N of [Fe(OEP)(NO)] (1) based on the B3LYP/LanL2DZ and BP86/LanL2DZ\* calculations. Listed are the force constants that differ in the QCC-NCA results for the different conformers. Other force constants are listed in Table 1.

| Conformer                                       | QCC-NCA Force Constant <sup>a</sup> |        |        | Int. ratio<br>NRVS <sup>b</sup> | Vibrational Frequency [cm <sup>-1</sup> ] <sup>c</sup> |                                  |                         |
|-------------------------------------------------|-------------------------------------|--------|--------|---------------------------------|--------------------------------------------------------|----------------------------------|-------------------------|
|                                                 | Fe-NO                               | N-O    | Fe-N-O |                                 | $\nu(\text{N-O})$                                      | $\nu(\text{Fe-NO})$ <sup>d</sup> | $\delta(\text{Fe-N-O})$ |
| <b>QCC-NCA: B3LYP/LanL2DZ (conformation I)</b>  |                                     |        |        |                                 |                                                        |                                  |                         |
| A                                               | 2.829                               | 12.166 | 0.341  | 1.48                            | 1671 (-72)                                             | 522 (~ -13)                      | 388 (-5)                |
| B                                               | 2.831                               | 12.166 | 0.339  | 1.31 *                          | 1671 (-72)                                             | 522/(528) (~ -13)                | 388 (-5)                |
| C                                               | 2.830                               | 12.168 | 0.340  | 1.52                            | 1671 (-72)                                             | 522 (~ -13)                      | 388 (-5)                |
| D                                               | 2.831                               | 12.171 | 0.348  | 1.69                            | 1671 (-72)                                             | 522 (~ -13)                      | 388 (-5)                |
| E                                               | 2.831                               | 12.169 | 0.354  | 1.65                            | 1671 (-72)                                             | 522 (~ -13)                      | 388 (-5)                |
| F                                               | 2.841                               | 12.169 | 0.324  | 1.71                            | 1671 (-72)                                             | 522 (~ -13)                      | 388 (-5)                |
| G                                               | 2.836                               | 12.167 | 0.336  | 1.56                            | 1671 (-72)                                             | 522 (~ -13)                      | 388 (-5)                |
| H                                               | 2.841                               | 12.165 | 0.324  | 1.39 *                          | 1671 (-72)                                             | 522/(528) (~ -13)                | 388 (-5)                |
| <b>QCC-NCA: B3LYP/LanL2DZ (conformation II)</b> |                                     |        |        |                                 |                                                        |                                  |                         |
| K                                               | 2.818                               | 12.167 | 0.341  | 1.60                            | 1671 (-73)                                             | 522/(523) (-12)                  | 388 (-5)                |
| L                                               | 2.812                               | 12.158 | 0.335  | 1.28 *                          | 1671 (-73)                                             | 521/(523) (-12)                  | 388 (-5)                |
| M                                               | 2.817                               | 12.161 | 0.342  | 1.59                            | 1671 (-73)                                             | 522/(523) (-12)                  | 388 (-5)                |
| N                                               | 2.831                               | 12.168 | 0.325  | 1.64                            | 1671 (-73)                                             | 522/(524) (-12)                  | 388 (-5)                |
| <b>QCC-NCA: BP86/LanL2DZ*</b>                   |                                     |        |        |                                 |                                                        |                                  |                         |
| F                                               | 2.938                               | 12.148 | 0.346  | 1.73                            | 1671 (-73)                                             | 522 (-14)                        | 388 (-7)                |
| E                                               | 2.934                               | 12.154 | 0.386  | 1.89                            | 1671 (-73)                                             | 522 (-14)                        | 388 (-7)                |
| N                                               | 2.939                               | 12.152 | 0.350  | 1.66                            | 1671 (-73)                                             | 522 (-14)                        | 388 (-7)                |

<sup>a</sup> Stretching force constants are given in [mdyn/Å] and bending force constants in [mdyn·Å].

<sup>b</sup> Predicted integral NRVS VDOS intensity ratio of  $e_{\text{Fe}}^2[\nu(\text{Fe-NO})]/e_{\text{Fe}}^2[\delta(\text{Fe-N-O})]$ ; \* = the Fe-N-O bend is particularly intense in these cases, which reduces the NRVS intensity ratio.

<sup>c</sup> Calculated for <sup>57</sup>Fe. The predicted <sup>15</sup>N<sup>18</sup>O isotope shift is listed in brackets.

<sup>d</sup> For the QCC-NCA/B3LYP/LanL2DZ simulations: in the <sup>15</sup>N<sup>18</sup>O labeled complex,  $\nu(\text{Fe-NO})$  becomes mixed with a porphyrin mode at ~507 cm<sup>-1</sup>. Because of this artificial mixing that seems to be absent in the experimental data, the true isotope shift of this feature can only be estimated.

**Table S3.** Cartesian coordinates of the fully optimized structure of **1** in conformation A (**1-A**) using B3LYP/LanL2DZ.

|    |             |             |             |
|----|-------------|-------------|-------------|
| Fe | 0.00361300  | 0.01585300  | 0.07968000  |
| N  | 0.67234500  | -1.87720900 | -0.07153900 |
| N  | 1.92383500  | 0.66344300  | 0.08044000  |
| N  | -0.60134000 | 1.92351100  | -0.24020200 |
| N  | -1.84518700 | -0.62157200 | -0.40221100 |
| C  | -0.09658200 | -3.03572000 | -0.18503200 |
| C  | 0.74480000  | -4.22558900 | -0.10389700 |
| C  | 0.24935400  | -5.65041900 | -0.16158600 |
| C  | 2.04148500  | -3.78214000 | 0.06574100  |
| C  | 3.29998500  | -4.60987800 | 0.16670000  |
| C  | 1.98572900  | -2.32367300 | 0.08769200  |
| C  | 3.09940500  | -1.50350100 | 0.23302400  |
| H  | 4.06235000  | -1.98639400 | 0.35767900  |
| C  | 3.07406500  | -0.11278700 | 0.21317500  |
| C  | 4.26157500  | 0.73075900  | 0.32111500  |
| C  | 5.67883800  | 0.22632700  | 0.43933300  |
| C  | 3.82198200  | 2.03885000  | 0.25632400  |
| C  | 4.64631800  | 3.30252800  | 0.28724400  |
| C  | 2.36899000  | 1.98382100  | 0.11145000  |
| C  | 1.55320500  | 3.10652500  | 0.01585500  |
| H  | 2.03272000  | 4.07805500  | 0.06341000  |
| C  | 0.17312800  | 3.07898800  | -0.15689800 |
| C  | -0.65785300 | 4.27260300  | -0.29841100 |
| C  | -0.15538700 | 5.69414600  | -0.23386400 |
| C  | -1.95529600 | 3.83139000  | -0.47207100 |
| C  | -3.20784000 | 4.65628900  | -0.63969200 |
| C  | -1.90692600 | 2.37186400  | -0.43330900 |
| C  | -3.01846700 | 1.54918800  | -0.58503700 |
| H  | -3.97906200 | 2.02878200  | -0.73728000 |
| C  | -2.99001400 | 0.15878300  | -0.57477600 |
| C  | -4.16718300 | -0.68456100 | -0.76149700 |
| C  | -5.57643700 | -0.17986500 | -0.95253100 |
| C  | -3.73013800 | -1.99367000 | -0.69778600 |
| C  | -4.54833200 | -3.25751300 | -0.80036900 |
| C  | -2.28850500 | -1.94216700 | -0.47390500 |
| C  | -1.47503600 | -3.06496100 | -0.36642800 |
| H  | -1.94974700 | -4.03659400 | -0.44530800 |
| N  | -0.27630000 | -0.09657300 | 1.79568900  |
| O  | -0.74680100 | -0.81457300 | 2.65606100  |
| H  | 1.06557700  | -6.30934900 | -0.48497100 |
| H  | -0.53833100 | -5.74733600 | -0.92187900 |
| C  | -0.29645200 | -6.16093100 | 1.20025100  |
| H  | 0.48448600  | -6.12459000 | 1.96997500  |
| H  | -0.64774500 | -7.19788500 | 1.11503000  |
| H  | -1.13248700 | -5.54208300 | 1.54840900  |
| H  | 3.04798200  | -5.61517700 | 0.52851000  |
| H  | 3.97789900  | -4.17918800 | 0.91675800  |
| C  | 4.05647700  | -4.73992800 | -1.18377600 |
| H  | 3.42061900  | -5.21561100 | -1.94086900 |
| H  | 4.96343200  | -5.34761200 | -1.06530700 |
| H  | 4.35058100  | -3.75576000 | -1.56901100 |
| H  | 6.30204300  | 0.99592700  | 0.91398400  |
| H  | 5.71476700  | -0.64702000 | 1.10541900  |

|   |             |             |             |
|---|-------------|-------------|-------------|
| C | 6.31455600  | -0.15465400 | -0.92587500 |
| H | 5.73396500  | -0.93852200 | -1.42776900 |
| H | 7.34034900  | -0.52177800 | -0.78864600 |
| H | 6.34815800  | 0.71368500  | -1.59560400 |
| H | 4.13729100  | 4.07181300  | 0.88475600  |
| H | 5.59939600  | 3.10373200  | 0.79513600  |
| C | 4.94670600  | 3.87810100  | -1.12425300 |
| H | 5.50925000  | 3.15475400  | -1.72751700 |
| H | 5.54080300  | 4.79869700  | -1.05058900 |
| H | 4.01980900  | 4.10984700  | -1.66323000 |
| H | 0.80475100  | 5.78021300  | -0.76160400 |
| H | -0.85441000 | 6.35429700  | -0.76438700 |
| C | 0.01927200  | 6.21897100  | 1.21801600  |
| H | -0.93771400 | 6.20531700  | 1.75419000  |
| H | 0.39684400  | 7.25013600  | 1.21623400  |
| H | 0.72417700  | 5.59562000  | 1.78177100  |
| H | -2.94363300 | 5.64606100  | -1.03512000 |
| H | -3.86714000 | 4.19519700  | -1.38834200 |
| C | -4.00136900 | 4.84517800  | 0.68246700  |
| H | -4.30437100 | 3.87868700  | 1.10374300  |
| H | -4.90566100 | 5.44423300  | 0.51152400  |
| H | -3.38806900 | 5.35692600  | 1.43450400  |
| H | -6.17125200 | -0.94414100 | -1.47023100 |
| H | -5.57702200 | 0.70198700  | -1.60830200 |
| C | -6.28604000 | 0.18278500  | 0.38100600  |
| H | -6.35271800 | -0.69379500 | 1.03723600  |
| H | -7.30403200 | 0.54902900  | 0.19294600  |
| H | -5.73577900 | 0.96146800  | 0.92351700  |
| H | -4.00350300 | -4.01456700 | -1.38168900 |
| H | -5.47185400 | -3.05156600 | -1.35756400 |
| C | -4.92521100 | -3.85844000 | 0.58201800  |
| H | -4.02895800 | -4.09401800 | 1.16885200  |
| H | -5.50874800 | -4.78050700 | 0.45927600  |
| H | -5.52480200 | -3.14796700 | 1.16444700  |

**Table S4.** Cartesian coordinates of the fully optimized structure of **1** in conformation B (**1-B**) using B3LYP/LanL2DZ.

|    |             |             |             |
|----|-------------|-------------|-------------|
| Fe | -0.01338200 | 0.00471700  | 0.08153200  |
| N  | -0.99146400 | 1.77453900  | -0.04382900 |
| N  | -1.80427500 | -0.94468500 | 0.07885900  |
| N  | 0.89050000  | -1.76255800 | -0.25767000 |
| N  | 1.69895000  | 0.94915200  | -0.39993400 |
| C  | -0.42533100 | 3.04400300  | -0.14899500 |
| C  | -1.44973200 | 4.07989400  | -0.04554900 |
| C  | -1.19382200 | 5.56738300  | -0.07956900 |
| C  | -2.65432600 | 3.42659500  | 0.12330300  |
| C  | -4.03239600 | 4.03208400  | 0.23785900  |
| C  | -2.35728500 | 1.99602200  | 0.12362200  |
| C  | -3.31911300 | 1.00026200  | 0.25965900  |
| H  | -4.34885800 | 1.31449100  | 0.39034000  |
| C  | -3.06479500 | -0.36685600 | 0.22099800  |
| C  | -4.09914400 | -1.39442600 | 0.31810300  |
| C  | -5.57956600 | -1.12900900 | 0.44130000  |
| C  | -3.45333100 | -2.61291900 | 0.23729600  |
| C  | -4.05919900 | -3.99503700 | 0.24868000  |
| C  | -2.02942400 | -2.32009500 | 0.09456800  |
| C  | -1.03896800 | -3.29141600 | -0.01079800 |
| H  | -1.34949600 | -4.32975800 | 0.02539600  |
| C  | 0.31701900  | -3.03307500 | -0.17957800 |
| C  | 1.33467300  | -4.06972000 | -0.32721400 |
| C  | 1.07590900  | -5.55536000 | -0.27024600 |
| C  | 2.54094200  | -3.41841100 | -0.49804000 |
| C  | 3.91277600  | -4.02341000 | -0.66859900 |
| C  | 2.25328000  | -1.98768600 | -0.45198300 |
| C  | 3.21393700  | -0.99338500 | -0.60134800 |
| H  | 4.23999500  | -1.30798800 | -0.75620500 |
| C  | 2.95581900  | 0.37315500  | -0.58427200 |
| C  | 3.97461400  | 1.40129900  | -0.77433400 |
| C  | 5.44702000  | 1.13715600  | -0.97195400 |
| C  | 3.32551600  | 2.61880000  | -0.70368400 |
| C  | 3.92058300  | 4.00113900  | -0.81527000 |
| C  | 1.91438800  | 2.32712000  | -0.46733200 |
| C  | 0.92833800  | 3.29989000  | -0.34303200 |
| H  | 1.23615500  | 4.33699700  | -0.41879900 |
| N  | 0.33934700  | -0.01704700 | 1.78730500  |
| O  | 1.22665900  | -0.22629700 | 2.59114200  |
| H  | -2.11296300 | 6.09184900  | -0.37130900 |
| H  | -0.44935000 | 5.80705400  | -0.85183100 |
| C  | -0.70757800 | 6.13143300  | 1.28393100  |
| H  | -1.45945300 | 5.96117900  | 2.06456000  |
| H  | -0.52081100 | 7.21140700  | 1.21535800  |
| H  | 0.21976500  | 5.64157200  | 1.60512300  |
| H  | -3.95100300 | 5.05865500  | 0.61812200  |
| H  | -4.62872000 | 3.48083800  | 0.97825900  |
| C  | -4.80056200 | 4.05925600  | -1.11215800 |
| H  | -4.25737600 | 4.65594300  | -1.85561800 |
| H  | -5.79985500 | 4.49614700  | -0.98365600 |
| H  | -4.91751600 | 3.04785700  | -1.52050800 |
| H  | -6.07016800 | -2.00028300 | 0.89523800  |
| H  | -5.75690700 | -0.28849700 | 1.12681700  |

|   |             |             |             |
|---|-------------|-------------|-------------|
| C | -6.26637000 | -0.82423100 | -0.91824400 |
| H | -5.82458800 | 0.05944200  | -1.39513000 |
| H | -7.33982700 | -0.63914800 | -0.77940800 |
| H | -6.15047400 | -1.66766300 | -1.61021500 |
| H | -3.43794800 | -4.67538100 | 0.84802500  |
| H | -5.03835800 | -3.96121600 | 0.74453100  |
| C | -4.24158600 | -4.59847200 | -1.17118100 |
| H | -4.90795200 | -3.97206300 | -1.77714800 |
| H | -4.67564700 | -5.60552000 | -1.11348200 |
| H | -3.28169700 | -4.66756200 | -1.69750400 |
| H | 0.15219400  | -5.79936800 | -0.81369500 |
| H | 1.88411500  | -6.08713800 | -0.78959400 |
| C | 0.96846700  | -6.10724600 | 1.17808900  |
| H | 1.89854800  | -5.93039100 | 1.73237200  |
| H | 0.77521600  | -7.18818800 | 1.16852900  |
| H | 0.15610700  | -5.61794800 | 1.72935400  |
| H | 3.81737900  | -5.03981600 | -1.07330300 |
| H | 4.48847000  | -3.45286100 | -1.41077700 |
| C | 4.72271700  | -4.08982100 | 0.65553500  |
| H | 4.85775000  | -3.09070900 | 1.08759500  |
| H | 5.71494000  | -4.52749900 | 0.48303500  |
| H | 4.20106600  | -4.70432300 | 1.39963900  |
| H | 5.91034400  | 1.99813700  | -1.47167200 |
| H | 5.59091600  | 0.28012000  | -1.64478000 |
| C | 6.20336000  | 0.86710700  | 0.35800700  |
| H | 6.13895900  | 1.73571000  | 1.02504100  |
| H | 7.26433000  | 0.65800800  | 0.16726400  |
| H | 5.77333900  | 0.00943000  | 0.88950600  |
| H | 3.25445200  | 4.65331900  | -1.39727100 |
| H | 4.86217900  | 3.94885300  | -1.37787000 |
| C | 4.20107000  | 4.66543900  | 0.56066200  |
| H | 3.27947600  | 4.76826500  | 1.14685900  |
| H | 4.63704800  | 5.66457000  | 0.42827700  |
| H | 4.90210200  | 4.06063700  | 1.14908800  |

**Table S5.** Cartesian coordinates of the fully optimized structure of **1** in conformation C (**1-C**) using B3LYP/LanL2DZ.

|    |             |             |             |
|----|-------------|-------------|-------------|
| Fe | 0.00804800  | 0.01778900  | 0.08086400  |
| N  | -0.90494300 | 1.82191100  | -0.04525300 |
| N  | -1.80061400 | -0.86767400 | 0.05220900  |
| N  | 0.86486800  | -1.77261700 | -0.26186400 |
| N  | 1.76614700  | 0.91517900  | -0.37808200 |
| C  | -0.29462100 | 3.07157000  | -0.13771200 |
| C  | -1.28547900 | 4.14109800  | -0.04161100 |
| C  | -0.97960500 | 5.61929700  | -0.06636800 |
| C  | -2.51374300 | 3.52868500  | 0.10891100  |
| C  | -3.87231100 | 4.17897300  | 0.21022700  |
| C  | -2.26450300 | 2.08963900  | 0.10685900  |
| C  | -3.25856400 | 1.12408200  | 0.22797500  |
| H  | -4.27958800 | 1.46879100  | 0.34902500  |
| C  | -3.04542800 | -0.24966900 | 0.18769300  |
| C  | -4.11024900 | -1.24494900 | 0.27242100  |
| C  | -5.58278500 | -0.93520700 | 0.38769700  |
| C  | -3.50191800 | -2.48288200 | 0.19378100  |
| C  | -4.15100400 | -3.84512600 | 0.19750100  |
| C  | -2.06896000 | -2.23652900 | 0.06338600  |
| C  | -1.11099800 | -3.23961900 | -0.03787600 |
| H  | -1.45540300 | -4.26717300 | -0.00589700 |
| C  | 0.25380000  | -3.02458900 | -0.19570400 |
| C  | 1.23980100  | -4.09131000 | -0.34178800 |
| C  | 0.93518400  | -5.56844900 | -0.29449300 |
| C  | 2.46654000  | -3.47618200 | -0.50108500 |
| C  | 3.81962100  | -4.12309800 | -0.66905600 |
| C  | 2.22290900  | -2.03748300 | -0.44758100 |
| C  | 3.21645100  | -1.07404200 | -0.58332600 |
| H  | 4.23241000  | -1.42173700 | -0.73418400 |
| C  | 3.00407500  | 0.30057400  | -0.55906100 |
| C  | 4.05831100  | 1.29596000  | -0.73603600 |
| C  | 5.52227400  | 0.98633700  | -0.93197900 |
| C  | 3.44811700  | 2.53298900  | -0.66097900 |
| C  | 4.08723200  | 3.89645300  | -0.75929400 |
| C  | 2.02566000  | 2.28341600  | -0.43708600 |
| C  | 1.06858400  | 3.28555800  | -0.31496500 |
| H  | 1.40838400  | 4.31326400  | -0.38185500 |
| N  | 0.17747300  | -0.10724600 | 1.81002100  |
| O  | 0.04676700  | -0.87261000 | 2.74505100  |
| H  | -1.87748300 | 6.17565300  | -0.36529200 |
| H  | -0.21949900 | 5.83700500  | -0.82983900 |
| C  | -0.48889600 | 6.16122000  | 1.30448100  |
| H  | -1.25287000 | 6.01035700  | 2.07730500  |
| H  | -0.26851800 | 7.23528100  | 1.24316400  |
| H  | 0.41998200  | 5.64154600  | 1.63151900  |
| H  | -3.76168200 | 5.20095100  | 0.59547400  |
| H  | -4.49493100 | 3.64494300  | 0.94166200  |
| C  | -4.62426700 | 4.23628100  | -1.14792800 |
| H  | -4.05158200 | 4.81371000  | -1.88440400 |
| H  | -5.60814600 | 4.70946100  | -1.02930300 |
| H  | -4.77414500 | 3.23050600  | -1.55950800 |
| H  | -6.10121400 | -1.79227500 | 0.83769400  |
| H  | -5.73849100 | -0.09120600 | 1.07412800  |

|   |             |             |             |
|---|-------------|-------------|-------------|
| C | -6.25411900 | -0.60784700 | -0.97421200 |
| H | -5.78640400 | 0.26473600  | -1.44685400 |
| H | -7.32267500 | -0.39357600 | -0.83955800 |
| H | -6.15875400 | -1.45211000 | -1.66831600 |
| H | -3.55299700 | -4.54713300 | 0.79526200  |
| H | -5.12986500 | -3.78268200 | 0.69110300  |
| C | -4.34879500 | -4.43606300 | -1.22554100 |
| H | -4.99248400 | -3.78569500 | -1.83073300 |
| H | -4.81593100 | -5.42848800 | -1.17333500 |
| H | -3.39019800 | -4.53460400 | -1.74956000 |
| H | 0.00701000  | -5.78107100 | -0.84345100 |
| H | 1.72936900  | -6.12210500 | -0.81264600 |
| C | 0.80383700  | -6.12370200 | 1.15070500  |
| H | 1.73570700  | -5.97617800 | 1.71046600  |
| H | 0.57956400  | -7.19856000 | 1.13482900  |
| H | 0.00342100  | -5.61342200 | 1.70025800  |
| H | 3.69399700  | -5.12990600 | -1.08925600 |
| H | 4.41987500  | -3.56157900 | -1.39855000 |
| C | 4.61677100  | -4.23569400 | 0.65963700  |
| H | 4.78643700  | -3.24749300 | 1.10474300  |
| H | 5.59330100  | -4.70785800 | 0.48847400  |
| H | 4.06745100  | -4.83940900 | 1.39258600  |
| H | 6.01406300  | 1.83766700  | -1.42103200 |
| H | 5.64024600  | 0.13310000  | -1.61472100 |
| C | 6.26823300  | 0.67639300  | 0.39497600  |
| H | 6.22148400  | 1.53417100  | 1.07738300  |
| H | 7.32491300  | 0.44734800  | 0.20316500  |
| H | 5.81894400  | -0.18158000 | 0.91013500  |
| H | 3.44108500  | 4.57630800  | -1.33192100 |
| H | 5.02542700  | 3.82060400  | -1.32494700 |
| C | 4.39174100  | 4.53537000  | 0.62355600  |
| H | 3.47614000  | 4.65188900  | 1.21650100  |
| H | 4.85088900  | 5.52547800  | 0.50219600  |
| H | 5.08150200  | 3.90583400  | 1.19925100  |

**Table S6.** Cartesian coordinates of the fully optimized structure of **1** in conformation D (**1-D**) using B3LYP/LanL2DZ.

|    |             |             |             |
|----|-------------|-------------|-------------|
| Fe | -0.01913900 | 0.00492700  | 0.07917800  |
| N  | 0.87668600  | -1.79185800 | -0.07152900 |
| N  | 1.79108200  | 0.88624200  | 0.04818700  |
| N  | -0.87370900 | 1.81441500  | -0.23942800 |
| N  | -1.78907300 | -0.87160800 | -0.37782700 |
| C  | 0.25710000  | -3.03915200 | -0.17114900 |
| C  | 1.24236000  | -4.11321600 | -0.08700700 |
| C  | 0.92831200  | -5.58947700 | -0.12346400 |
| C  | 2.47444000  | -3.50910600 | 0.06694100  |
| C  | 3.82896900  | -4.16872400 | 0.16097800  |
| C  | 2.23573800  | -2.06915000 | 0.07732700  |
| C  | 3.23707800  | -1.11238800 | 0.20347100  |
| H  | 4.25544600  | -1.46570200 | 0.32107500  |
| C  | 3.03286000  | 0.26297900  | 0.17411300  |
| C  | 4.10268000  | 1.25224600  | 0.26285100  |
| C  | 5.57387400  | 0.93413100  | 0.37093500  |
| C  | 3.49987400  | 2.49351300  | 0.19441600  |
| C  | 4.15605000  | 3.85245700  | 0.20506100  |
| C  | 2.06501300  | 2.25521300  | 0.06895300  |
| C  | 1.11283600  | 3.26510600  | -0.01916800 |
| H  | 1.46533800  | 4.28991000  | 0.01627100  |
| C  | -0.25503900 | 3.06141100  | -0.16937300 |
| C  | -1.23492900 | 4.13673600  | -0.30072800 |
| C  | -0.92080100 | 5.61173800  | -0.24620300 |
| C  | -2.46609400 | 3.52984800  | -0.45613900 |
| C  | -3.81672700 | 4.18509300  | -0.61067300 |
| C  | -2.22872400 | 2.08843000  | -0.41550300 |
| C  | -3.22801600 | 1.13054500  | -0.55254400 |
| H  | -4.24334000 | 1.48424200  | -0.69371700 |
| C  | -3.02293600 | -0.24533200 | -0.54436900 |
| C  | -4.08545300 | -1.23163800 | -0.72803300 |
| C  | -5.54830100 | -0.90966200 | -0.91186900 |
| C  | -3.48418000 | -2.47404200 | -0.67280800 |
| C  | -4.13259500 | -3.83195400 | -0.78642400 |
| C  | -2.05953100 | -2.23695100 | -0.45284800 |
| C  | -1.10705500 | -3.24531300 | -0.34681100 |
| H  | -1.45144900 | -4.27075200 | -0.42328600 |
| N  | -0.09522900 | -0.04937600 | 1.81870200  |
| O  | 0.55828900  | -0.30927100 | 2.80984000  |
| H  | 1.82400500  | -6.14826300 | -0.42426800 |
| H  | 0.16916900  | -5.79729800 | -0.89068500 |
| C  | 0.43147200  | -6.13914000 | 1.24206200  |
| H  | 1.19294800  | -5.99493200 | 2.01856600  |
| H  | 0.20898200  | -7.21227200 | 1.17282300  |
| H  | -0.47739600 | -5.61972600 | 1.56946600  |
| H  | 3.71240100  | -5.19261800 | 0.53921000  |
| H  | 4.45602900  | -3.64388600 | 0.89510100  |
| C  | 4.57774800  | -4.22104900 | -1.19914100 |
| H  | 3.99875800  | -4.78715600 | -1.93947700 |
| H  | 5.55761300  | -4.70384400 | -1.08640700 |
| H  | 4.73575300  | -3.21314000 | -1.60236700 |
| H  | 6.09853300  | 1.78551000  | 0.82447700  |
| H  | 5.72722000  | 0.08499900  | 1.05146900  |



|   |             |             |             |
|---|-------------|-------------|-------------|
| C | 6.23835600  | 0.61197900  | -0.99559900 |
| H | 5.75925700  | -0.25041600 | -1.47546900 |
| H | 7.30457000  | 0.38377500  | -0.86545400 |
| H | 6.15145700  | 1.46399500  | -1.68130900 |
| H | 3.56590900  | 4.55283800  | 0.81258100  |
| H | 5.13779900  | 3.78068100  | 0.69156900  |
| C | 4.34767800  | 4.45418600  | -1.21429200 |
| H | 4.98406100  | 3.80549900  | -1.82894200 |
| H | 4.82031300  | 5.44373000  | -1.15699100 |
| H | 3.38625800  | 4.56195800  | -1.73126500 |
| H | 0.00242900  | 5.82286500  | -0.80407500 |
| H | -1.71748700 | 6.17361600  | -0.75153500 |
| C | -0.77023200 | 6.15705200  | 1.20087100  |
| H | -1.69833300 | 6.01551600  | 1.76848000  |
| H | -0.53531900 | 7.22970200  | 1.18949500  |
| H | 0.03063100  | 5.63592000  | 1.73968400  |
| H | -3.68900600 | 5.19370000  | -1.02599000 |
| H | -4.42529800 | 3.63090500  | -1.33885600 |
| C | -4.60377300 | 4.29392700  | 0.72439700  |
| H | -4.77332700 | 3.30400400  | 1.16573200  |
| H | -5.58001000 | 4.77009500  | 0.56286300  |
| H | -4.04707100 | 4.89240100  | 1.45614100  |
| H | -6.04875300 | -1.75201900 | -1.40759400 |
| H | -5.66457000 | -0.04787200 | -1.58402600 |
| C | -6.28404200 | -0.61028500 | 0.42321900  |
| H | -6.23624200 | -1.47539600 | 1.09623100  |
| H | -7.34100700 | -0.37488900 | 0.24093600  |
| H | -5.82755200 | 0.24031100  | 0.94419100  |
| H | -3.49419300 | -4.50732700 | -1.37296500 |
| H | -5.07376800 | -3.74220700 | -1.34502000 |
| C | -4.43245200 | -4.48931500 | 0.58876000  |
| H | -3.51435000 | -4.61743600 | 1.17544500  |
| H | -4.89556400 | -5.47607400 | 0.45569700  |
| H | -5.11720100 | -3.86578600 | 1.17686100  |

**Table S7.** Cartesian coordinates of the fully optimized structure of **1** in conformation E (**1-E**) using B3LYP/LanL2DZ.

|    |             |             |             |
|----|-------------|-------------|-------------|
| Fe | -0.03306500 | 0.01477700  | 0.23187500  |
| N  | -0.73446700 | -1.83910200 | -0.12099200 |
| N  | -1.86209900 | 0.76258500  | -0.21999700 |
| N  | 0.72571100  | 1.88893100  | 0.10142100  |
| N  | 1.84409200  | -0.71466700 | 0.21262100  |
| C  | -0.01903600 | -3.03540200 | -0.06398900 |
| C  | -0.91082700 | -4.17977800 | -0.22349400 |
| C  | -0.47884400 | -5.62578900 | -0.25861200 |
| C  | -2.18548900 | -3.67011900 | -0.37329900 |
| C  | -3.47758700 | -4.43380100 | -0.53636000 |
| C  | -2.06609800 | -2.21696200 | -0.30546600 |
| C  | -3.13999100 | -1.34089900 | -0.42262800 |
| H  | -4.12378400 | -1.77318700 | -0.56821300 |
| C  | -3.04609600 | 0.04656300  | -0.38803000 |
| C  | -4.18328200 | 0.95035000  | -0.54253000 |
| C  | -5.61891100 | 0.52046100  | -0.71998000 |
| C  | -3.67841100 | 2.23403400  | -0.46683200 |
| C  | -4.43109800 | 3.53979100  | -0.54202000 |
| C  | -2.23657000 | 2.10390100  | -0.26747600 |
| C  | -1.36452200 | 3.18236200  | -0.16002300 |
| H  | -1.79091300 | 4.17782600  | -0.21682400 |
| C  | 0.01402900  | 3.08279900  | -0.00255800 |
| C  | 0.91286200  | 4.23206500  | 0.07826400  |
| C  | 0.48950300  | 5.67597800  | -0.03665100 |
| C  | 2.18736200  | 3.72515600  | 0.24225900  |
| C  | 3.48725000  | 4.48381600  | 0.35134500  |
| C  | 2.05750400  | 2.27035800  | 0.25674700  |
| C  | 3.12718600  | 1.39230200  | 0.39888400  |
| H  | 4.11390000  | 1.82203900  | 0.53154400  |
| C  | 3.03057400  | 0.00534600  | 0.36474900  |
| C  | 4.17320100  | -0.89719400 | 0.47072000  |
| C  | 5.61273400  | -0.46549800 | 0.60829500  |
| C  | 3.67150800  | -2.18196500 | 0.38832800  |
| C  | 4.43261000  | -3.48470500 | 0.41398600  |
| C  | 2.22550700  | -2.05630800 | 0.23242800  |
| C  | 1.35665600  | -3.13571300 | 0.11386000  |
| H  | 1.78534900  | -4.13078400 | 0.15560000  |
| N  | -0.19392800 | -0.12567900 | 1.96066200  |
| O  | 0.01868800  | -0.86973600 | 2.89762300  |
| H  | -1.32364200 | -6.26649200 | 0.02569600  |
| H  | 0.30382400  | -5.80612500 | 0.49131900  |
| C  | 0.04185200  | -6.07376700 | -1.65180500 |
| H  | -0.73763800 | -5.95396800 | -2.41461300 |
| H  | 0.34588200  | -7.12882900 | -1.63340000 |
| H  | 0.90537300  | -5.47294500 | -1.96304800 |
| H  | -3.26609000 | -5.42650500 | -0.95459500 |
| H  | -4.12738100 | -3.92979100 | -1.26536800 |
| C  | -4.25381700 | -4.60862700 | 0.79786200  |
| H  | -3.64715900 | -5.15446200 | 1.53111000  |
| H  | -5.18498900 | -5.16791100 | 0.63658300  |
| H  | -4.50858000 | -3.63652000 | 1.23769500  |
| H  | -6.18319700 | 1.32415900  | -1.21163700 |
| H  | -5.67405200 | -0.34595600 | -1.39389800 |

|   |             |             |             |
|---|-------------|-------------|-------------|
| C | -6.32496500 | 0.16400200  | 0.61711900  |
| H | -5.80599300 | -0.65285500 | 1.13377600  |
| H | -7.36269900 | -0.14734500 | 0.43812700  |
| H | -6.33804400 | 1.02809500  | 1.29298600  |
| H | -3.85264300 | 4.27723800  | -1.11601400 |
| H | -5.36832800 | 3.39097100  | -1.09454300 |
| C | -4.76575200 | 4.13751900  | 0.85251000  |
| H | -5.39581400 | 3.44918600  | 1.42937600  |
| H | -5.30318600 | 5.08954800  | 0.74911300  |
| H | -3.85390900 | 4.31904100  | 1.43469800  |
| H | -0.45256500 | 5.83815700  | 0.50550400  |
| H | 1.23583400  | 6.31589900  | 0.45262700  |
| C | 0.31359200  | 6.15152500  | -1.50524700 |
| H | 1.25647300  | 6.06131300  | -2.05881900 |
| H | -0.00455100 | 7.20202200  | -1.53866100 |
| H | -0.43789400 | 5.54798000  | -2.02895300 |
| H | 3.28734500  | 5.49849700  | 0.72056600  |
| H | 4.13892200  | 4.01083700  | 1.09928600  |
| C | 4.25748400  | 4.58776600  | -0.99383500 |
| H | 4.49704700  | 3.59346300  | -1.39077100 |
| H | 5.19716400  | 5.14051300  | -0.86222500 |
| H | 3.65546100  | 5.11008600  | -1.74776400 |
| H | 6.19213500  | -1.27293600 | 1.07550000  |
| H | 5.68624100  | 0.39404100  | 1.28905700  |
| C | 6.27951100  | -0.09514600 | -0.74496200 |
| H | 6.27517000  | -0.95279800 | -1.42912100 |
| H | 7.32136600  | 0.21657600  | -0.59260400 |
| H | 5.74482800  | 0.72576600  | -1.23868000 |
| H | 3.87279400  | -4.23772200 | 0.98593100  |
| H | 5.38222200  | -3.34221600 | 0.94663700  |
| C | 4.73673500  | -4.04991600 | -1.00077700 |
| H | 3.81195000  | -4.22635100 | -1.56405900 |
| H | 5.28272200  | -5.00011000 | -0.93103400 |
| H | 5.34789500  | -3.34526800 | -1.57831800 |

**Table S8.** Cartesian coordinates of the fully optimized structure of **1** in conformation F (**1-F**) using B3LYP/LanL2DZ.

|    |             |             |             |
|----|-------------|-------------|-------------|
| Fe | 0.03948700  | 0.00607800  | 0.23165900  |
| N  | 0.84485200  | 1.83523300  | -0.09295900 |
| N  | 1.83276400  | -0.82544900 | -0.21978200 |
| N  | -0.80962800 | -1.81387700 | 0.07663300  |
| N  | -1.79377500 | 0.83857000  | 0.20543000  |
| C  | 0.19283200  | 3.06576100  | -0.02962100 |
| C  | 1.14445100  | 4.16553700  | -0.16438000 |
| C  | 0.78692700  | 5.63207900  | -0.18751000 |
| C  | 2.39219100  | 3.59141700  | -0.30497000 |
| C  | 3.72515700  | 4.28623700  | -0.44395500 |
| C  | 2.19385800  | 2.14461000  | -0.25926200 |
| C  | 3.21990300  | 1.21344300  | -0.38270200 |
| H  | 4.22686100  | 1.59376300  | -0.51418900 |
| C  | 3.05140500  | -0.16746300 | -0.37517800 |
| C  | 4.14077300  | -1.12589000 | -0.54889100 |
| C  | 5.59643600  | -0.76690700 | -0.72142000 |
| C  | 3.57125400  | -2.38345800 | -0.49882700 |
| C  | 4.25544200  | -3.72421700 | -0.60562100 |
| C  | 2.13887100  | -2.18311500 | -0.29326500 |
| C  | 1.21150100  | -3.21549000 | -0.19631300 |
| H  | 1.58322700  | -4.23187300 | -0.26372400 |
| C  | -0.15874800 | -3.04438400 | -0.03134600 |
| C  | -1.11550900 | -4.14421900 | 0.04960200  |
| C  | -0.76943800 | -5.60842800 | -0.06810800 |
| C  | -2.36150100 | -3.57283600 | 0.22224800  |
| C  | -3.69757900 | -4.26462200 | 0.33856800  |
| C  | -2.15940800 | -2.12718400 | 0.23758800  |
| C  | -3.18436500 | -1.19732600 | 0.37562300  |
| H  | -4.19169900 | -1.57732400 | 0.50385900  |
| C  | -3.01738800 | 0.18293400  | 0.34270400  |
| C  | -4.11216800 | 1.14366100  | 0.44062000  |
| C  | -5.57362700 | 0.78710500  | 0.56098900  |
| C  | -3.54281300 | 2.40041300  | 0.36725400  |
| C  | -4.23446700 | 3.74154400  | 0.38513700  |
| C  | -2.10349200 | 2.19986100  | 0.22816100  |
| C  | -1.17865500 | 3.23411800  | 0.13160100  |
| H  | -1.55648500 | 4.24958000  | 0.17643900  |
| N  | 0.11588100  | -0.04282800 | 1.97129400  |
| O  | -0.54222700 | -0.28706200 | 2.96309000  |
| H  | 1.66591800  | 6.22786300  | 0.09090300  |
| H  | 0.02171100  | 5.84807100  | 0.57130900  |
| C  | 0.27538200  | 6.11366700  | -1.57310000 |
| H  | 1.03688600  | 5.95044200  | -2.34588600 |
| H  | 0.03350200  | 7.18456300  | -1.54891200 |
| H  | -0.62532200 | 5.56466400  | -1.87427000 |
| H  | 3.57335100  | 5.29272000  | -0.85514300 |
| H  | 4.35709700  | 3.75434900  | -1.16891400 |
| C  | 4.49181700  | 4.40698000  | 0.90184700  |
| H  | 3.90154800  | 4.97038500  | 1.63520600  |
| H  | 5.44959600  | 4.92501300  | 0.75962900  |
| H  | 4.69628200  | 3.41828100  | 1.33091400  |
| H  | 6.12206000  | -1.59767500 | -1.21071700 |
| H  | 5.69613900  | 0.09563600  | -1.39532300 |

|   |             |             |             |
|---|-------------|-------------|-------------|
| C | 6.31431100  | -0.44493600 | 0.61817900  |
| H | 5.84010100  | 0.40276700  | 1.12798400  |
| H | 7.36916400  | -0.19454700 | 0.44381400  |
| H | 6.27366900  | -1.30500300 | 1.29803600  |
| H | 3.63020100  | -4.42276600 | -1.17895200 |
| H | 5.18871000  | -3.61509500 | -1.17402000 |
| C | 4.58439400  | -4.35877800 | 0.77368400  |
| H | 5.26476700  | -3.71555800 | 1.34541000  |
| H | 5.06403200  | -5.33849800 | 0.64714000  |
| H | 3.67583300  | -4.49573400 | 1.37301900  |
| H | 0.15386600  | -5.82496000 | 0.48745800  |
| H | -1.55789600 | -6.20783100 | 0.40595200  |
| C | -0.59802000 | -6.08678100 | -1.53633800 |
| H | -1.52496000 | -5.93920900 | -2.10432000 |
| H | -0.34157300 | -7.15400600 | -1.57002600 |
| H | 0.19577100  | -5.52674300 | -2.04569100 |
| H | -3.55174100 | -5.27565500 | 0.74185800  |
| H | -4.33354400 | -3.73752700 | 1.06314200  |
| C | -4.45672000 | -4.37273500 | -1.01254100 |
| H | -4.64630000 | -3.38023000 | -1.44003100 |
| H | -5.42202100 | -4.87833700 | -0.87693300 |
| H | -3.87091600 | -4.94324300 | -1.74393100 |
| H | -6.11677700 | 1.62522500  | 1.01737700  |
| H | -5.69919500 | -0.06443200 | 1.24422500  |
| C | -6.24082100 | 0.44541300  | -0.79949600 |
| H | -6.17446800 | 1.29533700  | -1.49014100 |
| H | -7.30170600 | 0.19813100  | -0.66095300 |
| H | -5.74914000 | -0.41044700 | -1.27834800 |
| H | -3.66116900 | 4.45479000  | 0.99391800  |
| H | -5.21236500 | 3.64148300  | 0.87432400  |
| C | -4.44794000 | 4.34389100  | -1.03079500 |
| H | -3.49199600 | 4.48195800  | -1.55092000 |
| H | -4.94843300 | 5.31924600  | -0.96745100 |
| H | -5.06759700 | 3.67995300  | -1.64626200 |

**Table S9.** Cartesian coordinates of the fully optimized structure of **1** in conformation G (**1-G**) using B3LYP/LanL2DZ.

|    |             |             |             |
|----|-------------|-------------|-------------|
| Fe | 0.01837500  | 0.01621300  | 0.23020800  |
| N  | 0.57155300  | 1.93822700  | -0.09377900 |
| N  | 1.88467100  | -0.57183300 | -0.24742700 |
| N  | -0.59987200 | -1.89393000 | 0.07429200  |
| N  | -1.91816700 | 0.61206300  | 0.23832100  |
| C  | -0.23426800 | 3.07275000  | -0.01345800 |
| C  | 0.56420700  | 4.28735000  | -0.16082600 |
| C  | 0.01995500  | 5.69545200  | -0.16857800 |
| C  | 1.87308100  | 3.88123300  | -0.32886300 |
| C  | 3.10161800  | 4.74417800  | -0.48807900 |
| C  | 1.86524900  | 2.42150900  | -0.28456200 |
| C  | 3.00024200  | 1.62933200  | -0.42528400 |
| H  | 3.94849100  | 2.13486500  | -0.57125800 |
| C  | 3.00957500  | 0.23871400  | -0.41180100 |
| C  | 4.21062700  | -0.57310700 | -0.58613500 |
| C  | 5.60735500  | -0.03099600 | -0.76598100 |
| C  | 3.80859700  | -1.89332100 | -0.52179700 |
| C  | 4.66198800  | -3.13467400 | -0.61060800 |
| C  | 2.36390700  | -1.88009600 | -0.31226500 |
| C  | 1.57954300  | -3.02412000 | -0.21235500 |
| H  | 2.08149000  | -3.98277500 | -0.28194000 |
| C  | 0.19906700  | -3.03131200 | -0.04382800 |
| C  | -0.61059600 | -4.24373200 | 0.03211100  |
| C  | -0.08124700 | -5.65089800 | -0.09603800 |
| C  | -1.91860000 | -3.83508400 | 0.20786300  |
| C  | -3.15673500 | -4.69101400 | 0.31709200  |
| C  | -1.90038000 | -2.37555100 | 0.23634300  |
| C  | -3.03403600 | -1.58577300 | 0.39504500  |
| H  | -3.98283200 | -2.09440700 | 0.52558700  |
| C  | -3.04575600 | -0.19475700 | 0.38122400  |
| C  | -4.25366900 | 0.61679700  | 0.50669000  |
| C  | -5.65552300 | 0.07478600  | 0.64075100  |
| C  | -3.84947200 | 1.93627900  | 0.44246200  |
| C  | -4.70677900 | 3.17732900  | 0.48917100  |
| C  | -2.39752400 | 1.92018500  | 0.27908000  |
| C  | -1.61254500 | 3.06396500  | 0.17510000  |
| H  | -2.11558300 | 4.02291000  | 0.23414700  |
| N  | 0.30173800  | -0.08875500 | 1.94589700  |
| O  | 0.79681700  | -0.79037800 | 2.80586800  |
| H  | 0.81285700  | 6.39579400  | 0.12456600  |
| H  | -0.77136000 | 5.80016600  | 0.58677300  |
| C  | -0.54083200 | 6.12627400  | -1.55161100 |
| H  | 0.24255000  | 6.08457400  | -2.31869300 |
| H  | -0.92906400 | 7.15277700  | -1.51213900 |
| H  | -1.35418200 | 5.46365300  | -1.87241400 |
| H  | 2.81204900  | 5.72430000  | -0.88889900 |
| H  | 3.78244300  | 4.30234200  | -1.22907600 |
| C  | 3.87249700  | 4.95667100  | 0.84372600  |
| H  | 3.23387100  | 5.44915800  | 1.58761200  |
| H  | 4.76088700  | 5.58226700  | 0.68459400  |
| H  | 4.19787600  | 3.99931400  | 1.26899600  |
| H  | 6.22601900  | -0.77826900 | -1.28053400 |
| H  | 5.58930500  | 0.85186300  | -1.42006500 |

|   |             |             |             |
|---|-------------|-------------|-------------|
| C | 6.29716600  | 0.34729200  | 0.57361100  |
| H | 5.72180000  | 1.10913900  | 1.11393800  |
| H | 7.30617900  | 0.74159700  | 0.39406100  |
| H | 6.38273200  | -0.52904500 | 1.22794900  |
| H | 4.14991300  | -3.90469500 | -1.20462800 |
| H | 5.59098400  | -2.90244100 | -1.14807200 |
| C | 5.02635700  | -3.72877200 | 0.77817200  |
| H | 5.59482300  | -3.00392100 | 1.37395300  |
| H | 5.63679500  | -4.63458500 | 0.66551900  |
| H | 4.12500800  | -3.98928200 | 1.34621600  |
| H | 0.87643900  | -5.74417600 | 0.43467600  |
| H | -0.77149100 | -6.34735700 | 0.39818800  |
| C | 0.11264300  | -6.10420600 | -1.56935800 |
| H | -0.84116400 | -6.08525000 | -2.11110400 |
| H | 0.51127500  | -7.12646600 | -1.61273300 |
| H | 0.80818100  | -5.44112300 | -2.09834500 |
| H | -2.87738800 | -5.69233600 | 0.67063400  |
| H | -3.83546100 | -4.27841400 | 1.07663700  |
| C | -3.92868600 | -4.83542000 | -1.02329100 |
| H | -4.24580200 | -3.85709300 | -1.40512700 |
| H | -4.82296100 | -5.45888700 | -0.89151900 |
| H | -3.29584300 | -5.30136300 | -1.78879700 |
| H | -6.29238300 | 0.82571200  | 1.12701600  |
| H | -5.65978200 | -0.80222800 | 1.30291400  |
| C | -6.29879200 | -0.31627700 | -0.71811100 |
| H | -6.36430800 | 0.55431200  | -1.38252500 |
| H | -7.31251200 | -0.71145200 | -0.56954900 |
| H | -5.70398800 | -1.08169900 | -1.23171100 |
| H | -4.21297600 | 3.95601200  | 1.08718700  |
| H | -5.64938900 | 2.94973900  | 1.00451100  |
| C | -5.03599300 | 3.75359300  | -0.91559700 |
| H | -4.12061700 | 4.01478300  | -1.46087800 |
| H | -5.65462400 | 4.65683600  | -0.83035900 |
| H | -5.58345100 | 3.01876200  | -1.51887200 |

**Table S10.** Cartesian coordinates of the fully optimized structure of **1** in conformation H (**1-H**) using B3LYP/LanL2DZ.

|    |             |             |             |
|----|-------------|-------------|-------------|
| Fe | -0.01127100 | 0.00635700  | 0.23680200  |
| N  | -0.82374400 | -1.80248400 | -0.11242400 |
| N  | -1.77128000 | 0.86420100  | -0.23645100 |
| N  | 0.87650800  | 1.82267200  | 0.10620000  |
| N  | 1.82551400  | -0.85135300 | 0.24192000  |
| C  | -0.18437000 | -3.04237600 | -0.04903200 |
| C  | -1.14679200 | -4.12793700 | -0.21263200 |
| C  | -0.80685800 | -5.59847400 | -0.24674400 |
| C  | -2.38597700 | -3.53884800 | -0.36775500 |
| C  | -3.72390800 | -4.21766100 | -0.53434000 |
| C  | -2.17415300 | -2.09618400 | -0.30292000 |
| C  | -3.18734900 | -1.15189000 | -0.42974100 |
| H  | -4.19754400 | -1.51813500 | -0.57478500 |
| C  | -2.99997200 | 0.22601100  | -0.40579500 |
| C  | -4.07152900 | 1.20212300  | -0.57950800 |
| C  | -5.53100700 | 0.86531100  | -0.76275600 |
| C  | -3.48351500 | 2.45056000  | -0.51338800 |
| C  | -4.14839500 | 3.80171500  | -0.61052600 |
| C  | -2.05608000 | 2.22954100  | -0.29926500 |
| C  | -1.11738700 | 3.24994700  | -0.19232900 |
| H  | -1.47722100 | 4.27044000  | -0.26228500 |
| C  | 0.24955000  | 3.06168300  | -0.01498500 |
| C  | 1.22216900  | 4.14785600  | 0.07275700  |
| C  | 0.90023100  | 5.61644500  | -0.05740400 |
| C  | 2.45637200  | 3.55637400  | 0.26013800  |
| C  | 3.80307500  | 4.22609900  | 0.38381300  |
| C  | 2.22878700  | 2.11304100  | 0.27979000  |
| C  | 3.23706300  | 1.16774500  | 0.43803200  |
| H  | 4.24785500  | 1.53385700  | 0.57996000  |
| C  | 3.05263400  | -0.21076200 | 0.40318300  |
| C  | 4.13559500  | -1.18497700 | 0.51991800  |
| C  | 5.59837300  | -0.84596100 | 0.67153100  |
| C  | 3.55334500  | -2.43449600 | 0.43016800  |
| C  | 4.22761300  | -3.78424000 | 0.45803400  |
| C  | 2.11927000  | -2.21370400 | 0.26180700  |
| C  | 1.18061700  | -3.23303400 | 0.13727400  |
| H  | 1.54093800  | -4.25500500 | 0.17953600  |
| N  | -0.36361100 | -0.03543800 | 1.94193200  |
| O  | -1.24302500 | -0.27934200 | 2.74398900  |
| H  | -1.69574700 | -6.18571900 | 0.01807600  |
| H  | -0.05138000 | -5.83157300 | 0.51662600  |
| C  | -0.28928300 | -6.07251700 | -1.63260500 |
| H  | -1.04702900 | -5.90469500 | -2.40813500 |
| H  | -0.04807200 | -7.14365400 | -1.61335500 |
| H  | 0.61299900  | -5.52210800 | -1.92630600 |
| H  | -3.57679600 | -5.21937300 | -0.95871500 |
| H  | -4.34115200 | -3.66864100 | -1.25912200 |
| C  | -4.50804300 | -4.35030000 | 0.80022500  |
| H  | -3.93715900 | -4.93938600 | 1.52872800  |
| H  | -5.47384200 | -4.84675800 | 0.63685600  |
| H  | -4.69794100 | -3.36666800 | 1.24698100  |
| H  | -6.04191300 | 1.70533000  | -1.25170900 |
| H  | -5.63898600 | 0.00686200  | -1.44057400 |



|   |             |             |             |
|---|-------------|-------------|-------------|
| C | -6.25979500 | 0.54858200  | 0.57217900  |
| H | -5.79009000 | -0.29773600 | 1.08814400  |
| H | -7.31363900 | 0.29929000  | 0.39036700  |
| H | -6.22304600 | 1.41060800  | 1.24978700  |
| H | -3.52145300 | 4.49063200  | -1.19379600 |
| H | -5.09155100 | 3.70606200  | -1.16468000 |
| C | -4.44791500 | 4.44125000  | 0.77318700  |
| H | -5.12162500 | 3.80337000  | 1.35854400  |
| H | -4.92372000 | 5.42359700  | 0.65283000  |
| H | -3.52818100 | 4.57408600  | 1.35611300  |
| H | -0.02734400 | 5.84982600  | 0.48421800  |
| H | 1.69080000  | 6.20708600  | 0.42412600  |
| C | 0.75522000  | 6.08860600  | -1.53044600 |
| H | 1.68843400  | 5.92624500  | -2.08452500 |
| H | 0.51286200  | 7.15872200  | -1.57379500 |
| H | -0.03799000 | 5.53538100  | -2.04768600 |
| H | 3.66919500  | 5.24975400  | 0.75831300  |
| H | 4.41644300  | 3.70618300  | 1.13292300  |
| C | 4.58737200  | 4.28609100  | -0.95591700 |
| H | 4.76035100  | 3.28018400  | -1.35809200 |
| H | 5.56188300  | 4.77226400  | -0.81511700 |
| H | 4.02700100  | 4.85322200  | -1.70952200 |
| H | 6.12231300  | -1.69164000 | 1.13650300  |
| H | 5.72010900  | 0.00247200  | 1.35941300  |
| C | 6.29727200  | -0.50821800 | -0.67403000 |
| H | 6.24502300  | -1.35921900 | -1.36452600 |
| H | 7.35521200  | -0.26254300 | -0.51197000 |
| H | 5.81781000  | 0.34755400  | -1.16522300 |
| H | 3.62477600  | -4.49616200 | 1.03912700  |
| H | 5.18911800  | -3.70169300 | 0.98201600  |
| C | 4.48257700  | -4.37548800 | -0.95569200 |
| H | 3.54347400  | -4.49659700 | -1.50969400 |
| H | 4.96872800  | -5.35760200 | -0.88515100 |
| H | 5.13098300  | -3.71331500 | -1.54275600 |

**Table S11.** Cartesian coordinates of the fully optimized structure of **1** in conformation K (**1-K**) using B3LYP/LanL2DZ.

|    |             |             |             |
|----|-------------|-------------|-------------|
| Fe | -0.01529700 | 0.01823300  | 0.15737200  |
| N  | 1.38179200  | -1.43050600 | 0.09657900  |
| N  | 1.46299000  | 1.40303800  | 0.12390100  |
| N  | -1.35113100 | 1.48489100  | -0.25795000 |
| N  | -1.42488000 | -1.35030100 | -0.28681500 |
| C  | 1.16427500  | -2.80719700 | 0.04179400  |
| C  | 2.42092200  | -3.53665800 | 0.18080800  |
| C  | 2.56295600  | -5.03825000 | 0.13085100  |
| C  | 3.41416100  | -2.58806700 | 0.33041100  |
| C  | 4.89911500  | -2.80942900 | 0.48268100  |
| C  | 2.75831400  | -1.28456200 | 0.27970000  |
| C  | 3.42790600  | -0.07039100 | 0.38760500  |
| H  | 4.50131000  | -0.10270400 | 0.53823800  |
| C  | 2.82844600  | 1.18175400  | 0.29722900  |
| C  | 3.55636700  | 2.44647100  | 0.36279000  |
| C  | 5.05196900  | 2.58246400  | 0.51040000  |
| C  | 2.61552700  | 3.44908900  | 0.22908600  |
| C  | 2.83957800  | 4.94120400  | 0.19577700  |
| C  | 1.31990900  | 2.78890900  | 0.08633200  |
| C  | 0.11439700  | 3.46567100  | -0.06774000 |
| H  | 0.14666700  | 4.54948700  | -0.07194900 |
| C  | -1.12639000 | 2.85996300  | -0.23687300 |
| C  | -2.37378000 | 3.59343800  | -0.43979400 |
| C  | -2.50613300 | 5.09678400  | -0.45173100 |
| C  | -3.36846400 | 2.64636600  | -0.58798900 |
| C  | -4.84561100 | 2.86912400  | -0.80114900 |
| C  | -2.72115600 | 1.34187400  | -0.47177900 |
| C  | -3.38920000 | 0.12599200  | -0.57605000 |
| H  | -4.45935600 | 0.15544300  | -0.74866800 |
| C  | -2.78700200 | -1.12500000 | -0.49426600 |
| C  | -3.50498800 | -2.38921300 | -0.63119900 |
| C  | -4.99231800 | -2.52542700 | -0.84656500 |
| C  | -2.56599000 | -3.39385300 | -0.49830600 |
| C  | -2.78377300 | -4.88681500 | -0.53114800 |
| C  | -1.27957800 | -2.73734300 | -0.28577100 |
| C  | -0.07558800 | -3.41447000 | -0.12497200 |
| H  | -0.10416000 | -4.49810600 | -0.14243500 |
| N  | -0.25685000 | -0.12627700 | 1.87642400  |
| O  | -0.40307300 | -0.93742300 | 2.76950200  |
| H  | 1.73819300  | -5.51397500 | 0.67972500  |
| H  | 3.48435400  | -5.33507200 | 0.64929000  |
| C  | 2.60093200  | -5.60809400 | -1.31397100 |
| H  | 1.68613400  | -5.35544300 | -1.86410300 |
| H  | 2.70104300  | -6.70152000 | -1.29772100 |
| H  | 3.44928800  | -5.19478400 | -1.87339600 |
| H  | 5.07703100  | -3.80553100 | 0.90933300  |
| H  | 5.31649400  | -2.09152500 | 1.20234100  |
| C  | 5.68118900  | -2.69549700 | -0.85466700 |
| H  | 5.32816800  | -3.44211100 | -1.57688200 |
| H  | 6.75520800  | -2.85667500 | -0.69226000 |
| H  | 5.54773700  | -1.70561700 | -1.30850500 |
| H  | 5.28840400  | 3.56301300  | 0.94469800  |
| H  | 5.43067100  | 1.83543100  | 1.22190600  |

|   |             |             |             |
|---|-------------|-------------|-------------|
| C | 5.82075900  | 2.43562600  | -0.83148100 |
| H | 5.63024000  | 1.45828400  | -1.29197700 |
| H | 6.90282100  | 2.53552800  | -0.67314700 |
| H | 5.50647800  | 3.20620700  | -1.54636000 |
| H | 2.04645500  | 5.45541000  | 0.75666100  |
| H | 3.77990200  | 5.18008400  | 0.71017900  |
| C | 2.89851600  | 5.52617200  | -1.24230200 |
| H | 3.71900100  | 5.07420300  | -1.81328000 |
| H | 3.05854200  | 6.61220700  | -1.21347600 |
| H | 1.96739000  | 5.33101400  | -1.78843200 |
| H | -1.66165300 | 5.54677800  | -0.99238400 |
| H | -3.40960200 | 5.38009600  | -1.00806200 |
| C | -2.58248700 | 5.71977900  | 0.96953400  |
| H | -3.45067400 | 5.33339100  | 1.51756400  |
| H | -2.67265500 | 6.81262000  | 0.91049400  |
| H | -1.68692100 | 5.48028300  | 1.55595300  |
| H | -5.00381800 | 3.84988600  | -1.26930900 |
| H | -5.24145400 | 2.12693100  | -1.50829900 |
| C | -5.67330100 | 2.80582200  | 0.51196600  |
| H | -5.55723300 | 1.83339500  | 1.00636800  |
| H | -6.74079900 | 2.96216400  | 0.30734800  |
| H | -5.34285500 | 3.57806700  | 1.21767700  |
| H | -5.20421900 | -3.48506200 | -1.33676500 |
| H | -5.34716700 | -1.74688100 | -1.53605700 |
| C | -5.81443900 | -2.44719200 | 0.46917400  |
| H | -5.52405800 | -3.25041500 | 1.15759500  |
| H | -6.88874900 | -2.54336900 | 0.26312800  |
| H | -5.64766300 | -1.49303800 | 0.98426700  |
| H | -1.97135200 | -5.37560800 | -1.08718900 |
| H | -3.70731200 | -5.10966900 | -1.08185100 |
| C | -2.88137000 | -5.52550500 | 0.88193600  |
| H | -1.96962200 | -5.34253700 | 1.46350700  |
| H | -3.03069300 | -6.61092600 | 0.80805900  |
| H | -3.72268900 | -5.10119200 | 1.44357100  |

**Table S12.** Cartesian coordinates of the fully optimized structure of **1** in conformation L (**1-L**) using B3LYP/LanL2DZ.

|    |             |             |             |
|----|-------------|-------------|-------------|
| Fe | 0.00040400  | 0.00004700  | 0.15707500  |
| N  | -1.44606100 | 1.41868900  | 0.12322800  |
| N  | -1.44437000 | -1.42019800 | 0.12306100  |
| N  | 1.36404400  | -1.41529600 | -0.28208300 |
| N  | 1.36237000  | 1.41702500  | -0.28210400 |
| C  | -1.26950700 | 2.80022100  | 0.07044700  |
| C  | -2.54556600 | 3.49434100  | 0.22181000  |
| C  | -2.73148600 | 4.99139600  | 0.17747500  |
| C  | -3.50905700 | 2.51661000  | 0.37710900  |
| C  | -4.99851600 | 2.69294600  | 0.54277300  |
| C  | -2.81413500 | 1.23261300  | 0.31451000  |
| C  | -3.44638000 | -0.00193500 | 0.42196300  |
| H  | -4.51857700 | -0.00258400 | 0.58438500  |
| C  | -2.81267900 | -1.23571600 | 0.31434700  |
| C  | -3.50610000 | -2.52053000 | 0.37683200  |
| C  | -4.99535600 | -2.69864200 | 0.54243000  |
| C  | -2.54146900 | -3.49712900 | 0.22152100  |
| C  | -2.72562700 | -4.99439900 | 0.17710200  |
| C  | -1.26621000 | -2.80153200 | 0.07024000  |
| C  | -0.04351500 | -3.44209100 | -0.10241100 |
| H  | -0.04385100 | -4.52620800 | -0.11792900 |
| C  | 1.17762000  | -2.79870400 | -0.27190300 |
| C  | 2.44403400  | -3.49285000 | -0.48604900 |
| C  | 2.61896500  | -4.99169400 | -0.51310200 |
| C  | 3.41156300  | -2.51657900 | -0.62576200 |
| C  | 4.89387500  | -2.69623400 | -0.84275400 |
| C  | 2.73029100  | -1.23177400 | -0.49531700 |
| C  | 3.36535300  | 0.00204300  | -0.58915700 |
| H  | 4.43568500  | 0.00267500  | -0.76243600 |
| C  | 2.72883100  | 1.23511000  | -0.49534200 |
| C  | 3.40859000  | 2.52072000  | -0.62578700 |
| C  | 4.89069300  | 2.70211800  | -0.84276000 |
| C  | 2.43990900  | 3.49584700  | -0.48608700 |
| C  | 2.61307300  | 4.99489600  | -0.51315800 |
| C  | 1.17431000  | 2.80021300  | -0.27189400 |
| C  | -0.04755600 | 3.44218300  | -0.10229300 |
| H  | -0.04914100 | 4.52630000  | -0.11779500 |
| N  | 0.37880700  | -0.00000200 | 1.85745900  |
| O  | 1.30487500  | -0.00182200 | 2.64456200  |
| H  | -1.91800200 | 5.48964600  | 0.72348000  |
| H  | -3.65851800 | 5.25955200  | 0.70155300  |
| C  | -2.79337100 | 5.56490300  | -1.26509200 |
| H  | -1.87451700 | 5.34067900  | -1.82079300 |
| H  | -2.92480200 | 6.65495800  | -1.24441700 |
| H  | -3.63233600 | 5.12931000  | -1.82176400 |
| H  | -5.20268300 | 3.68061500  | 0.97736500  |
| H  | -5.38834500 | 1.95819300  | 1.26091200  |
| C  | -5.78782300 | 2.56412200  | -0.78898900 |
| H  | -5.46244300 | 3.32494900  | -1.50931100 |
| H  | -6.86474900 | 2.69293000  | -0.61713500 |
| H  | -5.62916000 | 1.58127600  | -1.24991500 |
| H  | -5.19835000 | -3.68657600 | 0.97697200  |
| H  | -5.38609600 | -1.96439100 | 1.26058700  |

|   |             |             |             |
|---|-------------|-------------|-------------|
| C | -5.78476900 | -2.57071000 | -0.78935300 |
| H | -5.62722500 | -1.58767600 | -1.25026400 |
| H | -6.86155100 | -2.70075800 | -0.61753100 |
| H | -5.45849600 | -3.33115500 | -1.50967600 |
| H | -1.91151800 | -5.49171900 | 0.72302300  |
| H | -3.65230500 | -5.26369500 | 0.70122400  |
| C | -2.78692300 | -5.56787700 | -1.26550100 |
| H | -3.62642600 | -5.13321700 | -1.82209100 |
| H | -2.91708200 | -6.65808600 | -1.24490100 |
| H | -1.86836200 | -5.34253800 | -1.82123600 |
| H | 1.78898100  | -5.45982500 | -1.06086000 |
| H | 3.53156600  | -5.24313700 | -1.06973900 |
| C | 2.70950200  | -5.62697200 | 0.90191100  |
| H | 3.56489600  | -5.22184700 | 1.45638200  |
| H | 2.83071900  | -6.71613600 | 0.83176600  |
| H | 1.80614600  | -5.41904900 | 1.48837800  |
| H | 5.07822000  | -3.66511300 | -1.32585300 |
| H | 5.26904900  | -1.93294700 | -1.53855100 |
| C | 5.71952900  | -2.63030700 | 0.47153000  |
| H | 5.57616800  | -1.66959300 | 0.98122100  |
| H | 6.79086900  | -2.75385500 | 0.26463000  |
| H | 5.41069600  | -3.42220300 | 1.16506500  |
| H | 5.07392100  | 3.67131100  | -1.32565200 |
| H | 5.26673100  | 1.93940600  | -1.53872300 |
| C | 5.71643500  | 2.63685100  | 0.47150300  |
| H | 5.40675700  | 3.42828900  | 1.16518700  |
| H | 6.78763900  | 2.76159300  | 0.26461400  |
| H | 5.57411600  | 1.67589000  | 0.98101700  |
| H | 1.78238200  | 5.46206600  | -1.06065800 |
| H | 3.52521100  | 5.24743100  | -1.07006400 |
| C | 2.70328600  | 5.63024100  | 0.90184500  |
| H | 1.80033700  | 5.42126500  | 1.48856600  |
| H | 2.82323200  | 6.71954600  | 0.83169700  |
| H | 3.55930700  | 5.22608300  | 1.45605400  |

**Table S13.** Cartesian coordinates of the fully optimized structure of **1** in conformation M (**1-M**) using B3LYP/LanL2DZ.

|    |             |             |             |
|----|-------------|-------------|-------------|
| Fe | 0.01535900  | 0.01819200  | 0.15738700  |
| N  | -1.46153800 | 1.40434500  | 0.12382700  |
| N  | -1.38308000 | -1.42921600 | 0.09659300  |
| N  | 1.42368200  | -1.35167200 | -0.28684600 |
| N  | 1.35267600  | 1.48363300  | -0.25785400 |
| C  | -1.31711600 | 2.79009600  | 0.08629800  |
| C  | -2.61210500 | 3.45150800  | 0.22899600  |
| C  | -2.83470200 | 4.94384200  | 0.19569400  |
| C  | -3.55392200 | 2.44980000  | 0.36261900  |
| C  | -5.04939500 | 2.58728300  | 0.51015500  |
| C  | -2.82723000 | 1.18438000  | 0.29710700  |
| C  | -3.42791300 | -0.06717500 | 0.38747800  |
| H  | -4.50135500 | -0.09844300 | 0.53805400  |
| C  | -2.75947200 | -1.28198800 | 0.27963700  |
| C  | -3.41654800 | -2.58486900 | 0.33030300  |
| C  | -4.90171500 | -2.80482600 | 0.48250400  |
| C  | -2.42418800 | -3.53439400 | 0.18076800  |
| C  | -2.56763300 | -5.03585500 | 0.13085900  |
| C  | -1.16685700 | -2.80611300 | 0.04179300  |
| C  | 0.07243000  | -3.41455300 | -0.12499500 |
| H  | 0.09997400  | -4.49821400 | -0.14246200 |
| C  | 1.27706200  | -2.73856800 | -0.28580400 |
| C  | 2.56286100  | -3.39629800 | -0.49832300 |
| C  | 2.77919900  | -4.88947000 | -0.53123900 |
| C  | 3.50281800  | -2.39254800 | -0.63113600 |
| C  | 4.99003100  | -2.53017500 | -0.84640100 |
| C  | 2.78602000  | -1.12764700 | -0.49422800 |
| C  | 3.38942400  | 0.12277100  | -0.57594200 |
| H  | 4.45961400  | 0.15118900  | -0.74852600 |
| C  | 2.72256100  | 1.33930300  | -0.47165600 |
| C  | 3.37112600  | 2.64318000  | -0.58785000 |
| C  | 4.84847900  | 2.86453700  | -0.80102100 |
| C  | 2.37734000  | 3.59120100  | -0.43967900 |
| C  | 2.51110100  | 5.09442400  | -0.45164300 |
| C  | 1.12925600  | 2.85890000  | -0.23679400 |
| C  | -0.11097900 | 3.46575000  | -0.06769900 |
| H  | -0.14225600 | 4.54959200  | -0.07189500 |
| N  | 0.25644000  | -0.12659400 | 1.87647400  |
| O  | 0.39785600  | -0.93798700 | 2.77009900  |
| H  | -2.04111000 | 5.45726900  | 0.75662800  |
| H  | -3.77482300 | 5.18363300  | 0.71004500  |
| C  | -2.89299200 | 5.52888600  | -1.24238000 |
| H  | -1.96202700 | 5.33284000  | -1.78846500 |
| H  | -3.05197400 | 6.61507400  | -1.21355000 |
| H  | -3.71388000 | 5.07771400  | -1.81341000 |
| H  | -5.28483300 | 3.56790900  | 0.94482100  |
| H  | -5.42893600 | 1.84037100  | 1.22133800  |
| C  | -5.81823700 | 2.44178400  | -0.83184100 |
| H  | -5.50309300 | 3.21231800  | -1.54639100 |
| H  | -6.90020400 | 2.54276700  | -0.67354400 |
| H  | -5.62872500 | 1.46442300  | -1.29271500 |
| H  | -5.08059400 | -3.80072400 | 0.90923200  |
| H  | -5.31846000 | -2.08646800 | 1.20207700  |

|   |             |             |             |
|---|-------------|-------------|-------------|
| C | -5.68360100 | -2.69028000 | -0.85490300 |
| H | -5.54901600 | -1.70063900 | -1.30892700 |
| H | -6.75780700 | -2.85022200 | -0.69251600 |
| H | -5.33138400 | -3.43743100 | -1.57695500 |
| H | -1.74337900 | -5.51233700 | 0.67984300  |
| H | -3.48936800 | -5.33177100 | 0.64921700  |
| C | -2.60600100 | -5.60575000 | -1.31393200 |
| H | -3.45387500 | -5.19163700 | -1.87349400 |
| H | -2.70720500 | -6.69907500 | -1.29761600 |
| H | -1.69088300 | -5.35405800 | -1.86397200 |
| H | 1.96620300  | -5.37746900 | -1.08713300 |
| H | 3.70241500  | -5.11320000 | -1.08213500 |
| C | 2.87648000  | -5.52829400 | 0.88180500  |
| H | 3.71893300  | -5.10552600 | 1.44290500  |
| H | 3.02375700  | -6.61399200 | 0.80787500  |
| H | 1.96542700  | -5.34362700 | 1.46392700  |
| H | 5.20106700  | -3.49005000 | -1.33650200 |
| H | 5.34564700  | -1.75201800 | -1.53594100 |
| C | 5.81214100  | -2.45257000 | 0.46938200  |
| H | 5.64664700  | -1.49798100 | 0.98408200  |
| H | 6.88633600  | -2.55032200 | 0.26347400  |
| H | 5.52057500  | -3.25511500 | 1.15809300  |
| H | 5.00759300  | 3.84506500  | -1.26936900 |
| H | 5.24365300  | 2.12184700  | -1.50802100 |
| C | 5.67609100  | 2.80074000  | 0.51211700  |
| H | 5.34651700  | 3.57359600  | 1.21756700  |
| H | 6.74376600  | 2.95581000  | 0.30745200  |
| H | 5.55892800  | 1.82861000  | 1.00684700  |
| H | 1.66710000  | 5.54518600  | -0.99241000 |
| H | 3.41490100  | 5.37687400  | -1.00787400 |
| C | 2.58785700  | 5.71740700  | 0.96960700  |
| H | 1.69193000  | 5.47889200  | 1.55587500  |
| H | 2.67918900  | 6.81014900  | 0.91052400  |
| H | 3.45553300  | 5.33013200  | 1.51781900  |

**Table S14.** Cartesian coordinates of the fully optimized structure of **1** in conformation N (**1-N**) using B3LYP/LanL2DZ.

|    |             |             |             |
|----|-------------|-------------|-------------|
| Fe | 0.03243600  | -0.00002700 | 0.15531900  |
| N  | -1.39768300 | 1.41576000  | 0.09570500  |
| N  | -1.39821700 | -1.41519600 | 0.09567800  |
| N  | 1.41660100  | -1.42024900 | -0.26290400 |
| N  | 1.41713800  | 1.41987100  | -0.26285600 |
| C  | -1.21489100 | 2.79916600  | 0.05143800  |
| C  | -2.49195900 | 3.49410900  | 0.18256900  |
| C  | -2.67430500 | 4.99168000  | 0.13921600  |
| C  | -3.46106500 | 2.51882600  | 0.31824300  |
| C  | -4.95270600 | 2.69895500  | 0.45793300  |
| C  | -2.77042700 | 1.23370000  | 0.26513100  |
| C  | -3.40677200 | 0.00064600  | 0.35969700  |
| H  | -4.48126800 | 0.00084400  | 0.50515000  |
| C  | -2.77089800 | -1.23264600 | 0.26504200  |
| C  | -3.46200800 | -2.51751000 | 0.31800400  |
| C  | -4.95373200 | -2.69709000 | 0.45752100  |
| C  | -2.49325900 | -3.49315100 | 0.18232700  |
| C  | -2.67614300 | -4.99065200 | 0.13883100  |
| C  | -1.21592400 | -2.79866700 | 0.05132100  |
| C  | 0.00747200  | -3.44209200 | -0.10093500 |
| H  | 0.00375700  | -4.52623800 | -0.11367400 |
| C  | 1.23254700  | -2.80164100 | -0.25597500 |
| C  | 2.50143500  | -3.49700800 | -0.45552800 |
| C  | 2.67691500  | -4.99580100 | -0.48001500 |
| C  | 3.46890200  | -2.51972800 | -0.58683900 |
| C  | 4.95331500  | -2.69811300 | -0.79090200 |
| C  | 2.78325500  | -1.23486200 | -0.46394300 |
| C  | 3.41917900  | -0.00054300 | -0.55123200 |
| H  | 4.49102100  | -0.00074400 | -0.71600800 |
| C  | 2.78371500  | 1.23401200  | -0.46392000 |
| C  | 3.46981900  | 2.51863200  | -0.58684800 |
| C  | 4.95428800  | 2.69650500  | -0.79095500 |
| C  | 2.50269200  | 3.49625200  | -0.45553400 |
| C  | 2.67868100  | 4.99498600  | -0.48007900 |
| C  | 1.23357200  | 2.80131400  | -0.25595100 |
| C  | 0.00872000  | 3.44217700  | -0.10083900 |
| H  | 0.00536600  | 4.52632700  | -0.11353600 |
| N  | 0.12689000  | -0.00024600 | 1.89475900  |
| O  | -0.55270700 | -0.00232200 | 2.90212500  |
| H  | -1.86924400 | 5.48708900  | 0.69994100  |
| H  | -3.60930300 | 5.25980700  | 0.64882400  |
| C  | -2.71202900 | 5.56897500  | -1.30262400 |
| H  | -1.78442300 | 5.34558600  | -1.84391500 |
| H  | -2.84303600 | 6.65905300  | -1.28116700 |
| H  | -3.54212100 | 5.13552000  | -1.87405300 |
| H  | -5.16202900 | 3.68792600  | 0.88691000  |
| H  | -5.35633800 | 1.96663500  | 1.17084700  |
| C  | -5.71898500 | 2.56911500  | -0.88713400 |
| H  | -5.37919500 | 3.32734900  | -1.60357700 |
| H  | -6.79836200 | 2.70118700  | -0.73428600 |
| H  | -5.55507500 | 1.58472300  | -1.34287800 |
| H  | -5.16348100 | -3.68605900 | 0.88629800  |
| H  | -5.35714900 | -1.96474600 | 1.17053500  |



|   |             |             |             |
|---|-------------|-------------|-------------|
| C | -5.71983100 | -2.56669400 | -0.88759000 |
| H | -5.55548600 | -1.58227800 | -1.34312700 |
| H | -6.79927400 | -2.69836600 | -0.73486800 |
| H | -5.38027800 | -3.32491900 | -1.60415500 |
| H | -1.87134100 | -5.48639700 | 0.69962600  |
| H | -3.61131200 | -5.25848300 | 0.64827900  |
| C | -2.71388300 | -5.56779600 | -1.30307800 |
| H | -3.54372900 | -5.13395400 | -1.87456800 |
| H | -2.84532000 | -6.65782300 | -1.28175500 |
| H | -1.78611100 | -5.34470800 | -1.84420900 |
| H | 1.85235600  | -5.46427900 | -1.03567400 |
| H | 3.59500100  | -5.24764900 | -1.02745000 |
| C | 2.75332800  | -5.63064200 | 0.93600500  |
| H | 3.60321600  | -5.22528600 | 1.49881000  |
| H | 2.87537100  | -6.71983600 | 0.86757300  |
| H | 1.84409700  | -5.42275500 | 1.51339000  |
| H | 5.14250500  | -3.66748700 | -1.27118200 |
| H | 5.33363900  | -1.93548700 | -1.48462600 |
| C | 5.76873000  | -2.63015400 | 0.52961600  |
| H | 5.62277300  | -1.66789000 | 1.03584900  |
| H | 6.84159000  | -2.75513500 | 0.33156700  |
| H | 5.45375800  | -3.42034300 | 1.22240800  |
| H | 5.14378500  | 3.66576800  | -1.27133700 |
| H | 5.33436500  | 1.93368200  | -1.48459900 |
| C | 5.76968800  | 2.62841200  | 0.52957100  |
| H | 5.45494100  | 3.41874100  | 1.22230300  |
| H | 6.84258500  | 2.75307400  | 0.33152000  |
| H | 5.62345200  | 1.66622500  | 1.03586800  |
| H | 1.85431100  | 5.46371100  | -1.03581200 |
| H | 3.59688200  | 5.24649600  | -1.02747400 |
| C | 2.75521400  | 5.62986900  | 0.93591500  |
| H | 1.84589200  | 5.42226400  | 1.51326000  |
| H | 2.87756900  | 6.71902600  | 0.86744700  |
| H | 3.60495600  | 5.22429700  | 1.49878500  |

**Table S15.** Cartesian coordinates of the fully optimized structure of **1** in conformation E (**1-E**) using BP86/LanL2DZ\*.

|    |             |             |             |
|----|-------------|-------------|-------------|
| Fe | -0.03119700 | 0.00446500  | 0.26291300  |
| N  | -0.71913000 | -1.83972200 | -0.12225500 |
| N  | -1.86905500 | 0.74735400  | -0.21792000 |
| N  | 0.71368100  | 1.89522400  | 0.09844800  |
| N  | 1.84772700  | -0.69672300 | 0.20339800  |
| C  | -0.00367400 | -3.02861900 | -0.05818100 |
| C  | -0.87805600 | -4.18465100 | -0.21659800 |
| C  | -0.43254300 | -5.62784900 | -0.25299300 |
| C  | -2.15980000 | -3.68255800 | -0.37301000 |
| C  | -3.44778700 | -4.45480200 | -0.54126100 |
| C  | -2.04192100 | -2.23086900 | -0.30480400 |
| C  | -3.12793400 | -1.36130500 | -0.42303500 |
| H  | -4.11802100 | -1.80732100 | -0.57119000 |
| C  | -3.04468200 | 0.03285400  | -0.38659200 |
| C  | -4.19424300 | 0.91972700  | -0.54046100 |
| C  | -5.62606700 | 0.47646300  | -0.72607300 |
| C  | -3.69636700 | 2.21046600  | -0.45996400 |
| C  | -4.45395600 | 3.51473200  | -0.53697200 |
| C  | -2.25538100 | 2.07812600  | -0.26003200 |
| C  | -1.38796400 | 3.16768800  | -0.14924200 |
| H  | -1.82760900 | 4.17028100  | -0.20201100 |
| C  | -0.00195500 | 3.07904600  | 0.00240700  |
| C  | 0.87704900  | 4.24295500  | 0.08104600  |
| C  | 0.43508100  | 5.68286300  | -0.02979900 |
| C  | 2.16076500  | 3.74633400  | 0.24091500  |
| C  | 3.45670500  | 4.51402900  | 0.35012900  |
| C  | 2.03307800  | 2.29200500  | 0.25099800  |
| C  | 3.11473000  | 1.41860900  | 0.39119200  |
| H  | 4.10896000  | 1.85978000  | 0.52545800  |
| C  | 3.02692900  | 0.02571700  | 0.35452100  |
| C  | 4.18134000  | -0.85929200 | 0.46020100  |
| C  | 5.61830800  | -0.41300100 | 0.59095300  |
| C  | 3.68743500  | -2.15243400 | 0.38490500  |
| C  | 4.45578200  | -3.45221200 | 0.41313000  |
| C  | 2.24232400  | -2.02815100 | 0.23303500  |
| C  | 1.37780800  | -3.11924400 | 0.12408200  |
| H  | 1.81827200  | -4.12150800 | 0.17305900  |
| N  | -0.16348900 | -0.16955700 | 1.93548200  |
| O  | 0.05681500  | -0.90741300 | 2.84290300  |
| H  | -1.27917000 | -6.27790500 | 0.04080700  |
| H  | 0.35839900  | -5.80137500 | 0.50348100  |
| C  | 0.08617900  | -6.07379600 | -1.64574100 |
| H  | -0.70289600 | -5.96302300 | -2.41279700 |
| H  | 0.40454200  | -7.13397000 | -1.62714400 |
| H  | 0.94828600  | -5.45945000 | -1.96557600 |
| H  | -3.22340900 | -5.45104700 | -0.96894100 |
| H  | -4.10176300 | -3.94910000 | -1.27919600 |
| C  | -4.22613900 | -4.64077900 | 0.78825600  |
| H  | -3.61396200 | -5.18950200 | 1.52804700  |
| H  | -5.16104800 | -5.20981300 | 0.62160100  |
| H  | -4.49018600 | -3.66476800 | 1.23603800  |
| H  | -6.19530100 | 1.28294700  | -1.22870900 |
| H  | -5.66809200 | -0.39548900 | -1.40893200 |

|   |             |             |             |
|---|-------------|-------------|-------------|
| C | -6.33943900 | 0.11470200  | 0.60364500  |
| H | -5.81349100 | -0.70335800 | 1.13016200  |
| H | -7.38153500 | -0.20862200 | 0.41621100  |
| H | -6.36589200 | 0.98482700  | 1.28576300  |
| H | -3.87351200 | 4.25638900  | -1.12133700 |
| H | -5.39666200 | 3.35696900  | -1.09658300 |
| C | -4.79181400 | 4.11608800  | 0.85331700  |
| H | -5.42694600 | 3.42403900  | 1.43704800  |
| H | -5.33446700 | 5.07513300  | 0.74642500  |
| H | -3.87460500 | 4.30128800  | 1.44270600  |
| H | -0.51294500 | 5.83253900  | 0.52434700  |
| H | 1.18230600  | 6.33286100  | 0.46626400  |
| C | 0.24818400  | 6.16230600  | -1.49393700 |
| H | 1.19700900  | 6.08591500  | -2.05689900 |
| H | -0.08645000 | 7.21719700  | -1.52343600 |
| H | -0.50239500 | 5.54611400  | -2.02284200 |
| H | 3.24456700  | 5.53272300  | 0.72973100  |
| H | 4.11521000  | 4.03968300  | 1.10495500  |
| C | 4.22585300  | 4.63069600  | -0.99252600 |
| H | 4.47320600  | 3.63256200  | -1.39955600 |
| H | 5.17007700  | 5.19273300  | -0.85780300 |
| H | 3.61678100  | 5.15711500  | -1.75083900 |
| H | 6.20714800  | -1.22061300 | 1.06840200  |
| H | 5.68486300  | 0.45577000  | 1.27579300  |
| C | 6.28073600  | -0.04471600 | -0.76287200 |
| H | 6.28363300  | -0.91192100 | -1.44925600 |
| H | 7.32850800  | 0.27970200  | -0.61291000 |
| H | 5.73443300  | 0.77482100  | -1.26573300 |
| H | 3.89802000  | -4.20899300 | 1.00004900  |
| H | 5.41290000  | -3.29728600 | 0.94850100  |
| C | 4.75855900  | -4.02492000 | -0.99695100 |
| H | 3.82621300  | -4.20882000 | -1.56263800 |
| H | 5.31231700  | -4.98069300 | -0.92334500 |
| H | 5.37043900  | -3.31688500 | -1.58632000 |

**Table S16.** Cartesian coordinates of the fully optimized structure of **1** in conformation F (**1-F**) using BP86/LanL2DZ\*.

|    |             |             |             |
|----|-------------|-------------|-------------|
| Fe | 0.03860600  | 0.00156600  | 0.26891100  |
| N  | 0.88636600  | 1.81982200  | -0.09211100 |
| N  | 1.82442700  | -0.86108500 | -0.20603600 |
| N  | -0.83661400 | -1.79201900 | 0.06985700  |
| N  | -1.76637300 | 0.87372500  | 0.20702500  |
| C  | 0.26473500  | 3.05857400  | -0.06244500 |
| C  | 1.22877000  | 4.14512300  | -0.20800200 |
| C  | 0.89327800  | 5.61663300  | -0.27707400 |
| C  | 2.47182700  | 3.54408900  | -0.31539800 |
| C  | 3.82142200  | 4.20969600  | -0.45115700 |
| C  | 2.23559800  | 2.10481100  | -0.24022800 |
| C  | 3.25122000  | 1.14962100  | -0.33094600 |
| H  | 4.27859700  | 1.51424500  | -0.44405100 |
| C  | 3.05479600  | -0.23368700 | -0.32944400 |
| C  | 4.13450900  | -1.20340700 | -0.49709700 |
| C  | 5.60007600  | -0.86834200 | -0.64132500 |
| C  | 3.53638500  | -2.45323600 | -0.47839200 |
| C  | 4.18913800  | -3.80974400 | -0.60003400 |
| C  | 2.10771100  | -2.21474500 | -0.29429600 |
| C  | 1.15223400  | -3.23212100 | -0.23058100 |
| H  | 1.50468100  | -4.26618800 | -0.31688500 |
| C  | -0.21959300 | -3.03133900 | -0.06663700 |
| C  | -1.19170300 | -4.11693500 | -0.00456500 |
| C  | -0.87672900 | -5.58449900 | -0.17209500 |
| C  | -2.42631800 | -3.52144400 | 0.20192400  |
| C  | -3.77904700 | -4.18293000 | 0.31724100  |
| C  | -2.18301200 | -2.08417900 | 0.24579300  |
| C  | -3.18941400 | -1.13203600 | 0.42093800  |
| H  | -4.21183900 | -1.49657600 | 0.57131600  |
| C  | -2.99546600 | 0.25030200  | 0.37979400  |
| C  | -4.07621600 | 1.22371900  | 0.48592700  |
| C  | -5.54094700 | 0.89161200  | 0.64514400  |
| C  | -3.48451100 | 2.47254800  | 0.37686400  |
| C  | -4.15028000 | 3.82812500  | 0.38350400  |
| C  | -2.05436900 | 2.23473200  | 0.21730400  |
| C  | -1.10984500 | 3.25544200  | 0.09339400  |
| H  | -1.47388100 | 4.28893900  | 0.11959800  |
| N  | 0.06574800  | -0.06522300 | 1.95456500  |
| O  | -0.59081400 | -0.32600900 | 2.91235000  |
| H  | 1.78518700  | 6.20933200  | 0.00415600  |
| H  | 0.11596200  | 5.86589100  | 0.47269200  |
| C  | 0.41007600  | 6.06777200  | -1.68103300 |
| H  | 1.19111700  | 5.88505000  | -2.44249700 |
| H  | 0.16627000  | 7.14768000  | -1.68691400 |
| H  | -0.49173000 | 5.50745700  | -1.99023600 |
| H  | 3.69061200  | 5.21560100  | -0.89477300 |
| H  | 4.45514300  | 3.64481600  | -1.16356900 |
| C  | 4.57257700  | 4.34933200  | 0.89955000  |
| H  | 3.98438600  | 4.95396800  | 1.61480800  |
| H  | 5.55441500  | 4.84035300  | 0.75599800  |
| H  | 4.74490800  | 3.36102000  | 1.36479400  |
| H  | 6.11959600  | -1.71194800 | -1.13645800 |
| H  | 5.72591400  | 0.00343100  | -1.31421500 |

|   |             |             |             |
|---|-------------|-------------|-------------|
| C | 6.30177300  | -0.57225100 | 0.71047400  |
| H | 5.82373600  | 0.27839700  | 1.23078700  |
| H | 7.36991800  | -0.32654000 | 0.55466700  |
| H | 6.24352700  | -1.44766000 | 1.38378300  |
| H | 3.56512800  | -4.47484000 | -1.22986000 |
| H | 5.15399700  | -3.70405600 | -1.13355800 |
| C | 4.44616700  | -4.49876800 | 0.76642800  |
| H | 5.11956600  | -3.88706900 | 1.39521900  |
| H | 4.91446200  | -5.49188300 | 0.62463100  |
| H | 3.50368000  | -4.63798500 | 1.32807100  |
| H | 0.05253300  | -5.83860300 | 0.37614600  |
| H | -1.68060400 | -6.18441800 | 0.29738500  |
| C | -0.72703400 | -6.01980400 | -1.65398600 |
| H | -1.66289100 | -5.83714400 | -2.21428900 |
| H | -0.48734000 | -7.09825000 | -1.72532000 |
| H | 0.07745400  | -5.45263900 | -2.15785100 |
| H | -3.64729900 | -5.22202700 | 0.67751200  |
| H | -4.38690300 | -3.66923700 | 1.08851800  |
| C | -4.57017800 | -4.21229100 | -1.01728000 |
| H | -4.73569600 | -3.19002500 | -1.40527500 |
| H | -5.55715800 | -4.69452200 | -0.87994300 |
| H | -4.01586000 | -4.77554800 | -1.79087500 |
| H | -6.05946000 | 1.75181800  | 1.11206400  |
| H | -5.66164400 | 0.04527900  | 1.35041100  |
| C | -6.25005500 | 0.54542600  | -0.69069600 |
| H | -6.20044600 | 1.39602200  | -1.39579000 |
| H | -7.31621500 | 0.30211800  | -0.51854900 |
| H | -5.77337400 | -0.32243000 | -1.18327200 |
| H | -3.54412700 | 4.54564600  | 0.97173200  |
| H | -5.12360600 | 3.75288200  | 0.90670800  |
| C | -4.38928500 | 4.40769600  | -1.03569900 |
| H | -3.43756700 | 4.51907900  | -1.58775200 |
| H | -4.87435900 | 5.40119500  | -0.97906600 |
| H | -5.04065900 | 3.73922500  | -1.62881100 |

**Table S17.** Cartesian coordinates of the fully optimized structure of **1** in conformation N (**1-N**) using BP86/LanL2DZ\*.

|    |             |             |             |
|----|-------------|-------------|-------------|
| Fe | 0.02942300  | -0.00000100 | 0.18880200  |
| N  | -1.39031200 | 1.41227100  | 0.08919600  |
| N  | -1.39051000 | -1.41203500 | 0.08921000  |
| N  | 1.42179000  | -1.42126400 | -0.25872100 |
| N  | 1.42201300  | 1.42108200  | -0.25869300 |
| C  | -1.21558000 | 2.79067600  | 0.02254200  |
| C  | -2.48632900 | 3.49354400  | 0.15595400  |
| C  | -2.66896300 | 4.99114700  | 0.08259700  |
| C  | -3.45390700 | 2.51658500  | 0.33167600  |
| C  | -4.94450800 | 2.69393000  | 0.49611100  |
| C  | -2.75403500 | 1.23774400  | 0.28746300  |
| C  | -3.39020400 | 0.00026600  | 0.40659600  |
| H  | -4.47251900 | 0.00034400  | 0.57811600  |
| C  | -2.75421000 | -1.23730300 | 0.28748700  |
| C  | -3.45427000 | -2.51603800 | 0.33170500  |
| C  | -4.94489600 | -2.69316000 | 0.49615800  |
| C  | -2.48684000 | -3.49314400 | 0.15597500  |
| C  | -2.66970600 | -4.99071900 | 0.08262600  |
| C  | -1.21599000 | -2.79046900 | 0.02254400  |
| C  | 0.00963900  | -3.43799100 | -0.14278800 |
| H  | 0.00205200  | -4.53326000 | -0.17408500 |
| C  | 1.24289500  | -2.79527600 | -0.27617900 |
| C  | 2.50767200  | -3.49900300 | -0.46647600 |
| C  | 2.67652000  | -4.99913300 | -0.51768500 |
| C  | 3.48168500  | -2.51805800 | -0.56333900 |
| C  | 4.97018000  | -2.69180400 | -0.74998400 |
| C  | 2.78571900  | -1.24017700 | -0.43161100 |
| C  | 3.42647600  | -0.00023700 | -0.49952300 |
| H  | 4.51290400  | -0.00032100 | -0.64440200 |
| C  | 2.78591200  | 1.23980200  | -0.43157900 |
| C  | 3.48206900  | 2.51758200  | -0.56327200 |
| C  | 4.97059000  | 2.69111300  | -0.74990400 |
| C  | 2.50819800  | 3.49866800  | -0.46639400 |
| C  | 2.67726800  | 4.99877500  | -0.51757300 |
| C  | 1.24331600  | 2.79512000  | -0.27612700 |
| C  | 0.01015100  | 3.43801400  | -0.14275500 |
| H  | 0.00272900  | 4.53328400  | -0.17404100 |
| N  | 0.07254700  | -0.00006900 | 1.87531800  |
| O  | -0.61052800 | -0.00051200 | 2.84997100  |
| H  | -1.85868900 | 5.49997900  | 0.64228000  |
| H  | -3.61152600 | 5.26727700  | 0.59452100  |
| C  | -2.70714800 | 5.54324700  | -1.36721300 |
| H  | -1.77257200 | 5.30914500  | -1.91003200 |
| H  | -2.83975500 | 6.64234100  | -1.36565300 |
| H  | -3.54270600 | 5.09649700  | -1.93751500 |
| H  | -5.14571300 | 3.69323000  | 0.92949900  |
| H  | -5.33419300 | 1.96084000  | 1.23004300  |
| C  | -5.73656400 | 2.55610900  | -0.83091300 |
| H  | -5.41163700 | 3.31769500  | -1.56401000 |
| H  | -6.82215900 | 2.68600300  | -0.65712100 |
| H  | -5.57691500 | 1.56303400  | -1.29071000 |
| H  | -5.14624400 | -3.69241600 | 0.92958000  |
| H  | -5.33446400 | -1.95999000 | 1.23007200  |

|   |             |             |             |
|---|-------------|-------------|-------------|
| C | -5.73694300 | -2.55526200 | -0.83086300 |
| H | -5.57716000 | -1.56222100 | -1.29068600 |
| H | -6.82255500 | -2.68500100 | -0.65705900 |
| H | -5.41212700 | -3.31691200 | -1.56394200 |
| H | -1.85951100 | -5.49967500 | 0.64231200  |
| H | -3.61231200 | -5.26669800 | 0.59454900  |
| C | -2.70797600 | -5.54282200 | -1.36718100 |
| H | -3.54346000 | -5.09594300 | -1.93748900 |
| H | -2.84075700 | -6.64189400 | -1.36561300 |
| H | -1.77336100 | -5.30887500 | -1.90999900 |
| H | 1.85306900  | -5.45372700 | -1.10409900 |
| H | 3.60916300  | -5.24275900 | -1.06340200 |
| C | 2.72857000  | -5.66469700 | 0.88322300  |
| H | 3.57795300  | -5.27343900 | 1.47339500  |
| H | 2.84710300  | -6.76179300 | 0.79359600  |
| H | 1.80521300  | -5.46273600 | 1.45727100  |
| H | 5.16426000  | -3.66164600 | -1.24888900 |
| H | 5.35904400  | -1.91391400 | -1.43681200 |
| C | 5.77011800  | -2.64286600 | 0.57867600  |
| H | 5.61534300  | -1.68158200 | 1.10306900  |
| H | 6.85440800  | -2.76382200 | 0.39072900  |
| H | 5.44689700  | -3.44960800 | 1.26264800  |
| H | 5.16481500  | 3.66091300  | -1.24883300 |
| H | 5.35935300  | 1.91314900  | -1.43670500 |
| C | 5.77050700  | 2.64210000  | 0.57876600  |
| H | 5.44738100  | 3.44889700  | 1.26271900  |
| H | 6.85481500  | 2.76291400  | 0.39082900  |
| H | 5.61560600  | 1.68084600  | 1.10317800  |
| H | 1.85392700  | 5.45349500  | -1.10404500 |
| H | 3.60998700  | 5.24226900  | -1.06321600 |
| C | 2.72931000  | 5.66432000  | 0.88334500  |
| H | 1.80588000  | 5.46249100  | 1.45732200  |
| H | 2.84801200  | 6.76139800  | 0.79373500  |
| H | 3.57859000  | 5.27293100  | 1.47357900  |

**Table S18.** Polarization functions applied for the LanL2DZ\* basis set. See refs:  
(a) Praneeth, V. K. K.; Neese, F.; Lehnert, N. *Inorg. Chem.* **2005**, *44*, 2570-2572.  
(b) Praneeth, V. K. K.; Näther, C.; Peters, G.; Lehnert, N. *Inorg. Chem.* **2006**, *45*, 2795-2811.

```
Fe 0
F 1 1.00
0.1050000000D+01 0.1000000000D+01
****
O 0
D 1 1.00
0.1292000000D+01 0.1000000000D+01
****
C 0
D 1 1.00
0.6260000000D+00 0.1000000000D+01
****
N 0
D 1 1.00
0.9130000000D+00 0.1000000000D+01
****
```



**Table S19.** Complete force field of [Fe(OEP)(NO)] used for the QCC-NCA simulation. The definition of the internal coordinates follows the usual terminology where type 1 is a bond stretch, 2 an in-plane angle bend, 3 an out-of-plane bend, 4 a torsion, and 6 a linear bend. The atomic numbering scheme corresponds to the structures provided in Tables S3 – S17.

| [Fe(OEP)(NO)] BP86/LanL2DZ* |    |    |           |
|-----------------------------|----|----|-----------|
| 0                           | 0  | 0  |           |
| 1                           | 1  | 38 | R:Fe-N(O) |
| 1                           | 38 | 39 | R:N-O     |
| 1                           | 1  | 2  | R:Fe-N2   |
| 1                           | 1  | 3  | R:Fe-N3   |
| 1                           | 1  | 4  | R:Fe-N4   |
| 1                           | 1  | 5  | R:Fe-N5   |
| 1                           | 2  | 6  | R:N2-C6   |
| 1                           | 2  | 11 | R:N2-C11  |
| 1                           | 3  | 14 | R:N3-C14  |
| 1                           | 3  | 19 | R:N3-C19  |
| 1                           | 4  | 22 | R:N4-C22  |
| 1                           | 4  | 27 | R:N4-C27  |
| 1                           | 5  | 30 | R:N5-C30  |
| 1                           | 5  | 35 | R:N5-C35  |
| 1                           | 6  | 7  | R:C6-C7   |
| 1                           | 7  | 9  | R:C7-C9   |
| 1                           | 9  | 11 | R:C9-C11  |
| 1                           | 14 | 15 | R:C14-C15 |
| 1                           | 15 | 17 | R:C15-C17 |
| 1                           | 17 | 19 | R:C17-C19 |
| 1                           | 22 | 23 | R:C22-C23 |
| 1                           | 23 | 25 | R:C23-C25 |
| 1                           | 25 | 27 | R:C25-C27 |
| 1                           | 30 | 31 | R:C30-C31 |
| 1                           | 31 | 33 | R:C31-C33 |
| 1                           | 33 | 35 | R:C33-C35 |
| 1                           | 11 | 12 | R:C11-M12 |
| 1                           | 12 | 14 | R:M12-C14 |
| 1                           | 19 | 20 | R:C19-M20 |
| 1                           | 20 | 22 | R:M20-C22 |
| 1                           | 27 | 28 | R:C27-M28 |
| 1                           | 28 | 30 | R:M28-C30 |
| 1                           | 35 | 36 | R:C35-M36 |
| 1                           | 36 | 6  | R:M36-C6  |
| 1                           | 12 | 13 | R:M12-H   |
| 1                           | 20 | 21 | R:M20-H   |
| 1                           | 28 | 29 | R:M28-H   |
| 1                           | 36 | 37 | R:M36-H   |
| 1                           | 7  | 8  | R:C7-C8   |
| 1                           | 9  | 10 | R:C9-C10  |
| 1                           | 15 | 16 | R:C15-C16 |
| 1                           | 17 | 18 | R:C17-C18 |
| 1                           | 23 | 24 | R:C23-C24 |
| 1                           | 25 | 26 | R:C25-C26 |
| 1                           | 31 | 32 | R:C31-C32 |
| 1                           | 33 | 34 | R:C33-C34 |
| 2                           | 1  | 38 | a:Fe-N-O  |

|   |    |    |    |                |
|---|----|----|----|----------------|
| 2 | 38 | 1  | 2  | a1:N(O)-Fe-N2  |
| 2 | 38 | 1  | 3  | a1:N(O)-Fe-N3  |
| 2 | 38 | 1  | 4  | a1:N(O)-Fe-N4  |
| 2 | 38 | 1  | 5  | a1:N(O)-Fe-N5  |
| 2 | 2  | 1  | 3  | a1:N2-Fe-N3    |
| 2 | 3  | 1  | 4  | a1:N3-Fe-N4    |
| 2 | 4  | 1  | 5  | a1:N4-Fe-N5    |
| 2 | 5  | 1  | 2  | a1:N5-Fe-N2    |
| 2 | 1  | 2  | 6  | a2:Fe-N2-C6    |
| 2 | 2  | 6  | 7  | a2:N2-C6-C7    |
| 2 | 6  | 7  | 9  | a2:C6-C7-C9    |
| 2 | 7  | 9  | 11 | a2:C7-C9-C11   |
| 2 | 9  | 11 | 2  | a2:C9-C11-N2   |
| 2 | 11 | 2  | 1  | a2:C11-N2-Fe   |
| 2 | 1  | 3  | 14 | a2:Fe-N3-C14   |
| 2 | 3  | 14 | 15 | a2:N3-C14-C15  |
| 2 | 14 | 15 | 17 | a2:C14-C15-C17 |
| 2 | 15 | 17 | 19 | a2:C15-C17-C19 |
| 2 | 17 | 19 | 3  | a2:C17-C19-N3  |
| 2 | 19 | 3  | 1  | a2:C19-N3-Fe   |
| 2 | 1  | 4  | 22 | a2:Fe-N4-C22   |
| 2 | 4  | 22 | 23 | a2:N4-C22-C23  |
| 2 | 22 | 23 | 25 | a2:C22-C23-C25 |
| 2 | 23 | 25 | 27 | a2:C23-C25-C27 |
| 2 | 25 | 27 | 4  | a2:C25-C27-N4  |
| 2 | 27 | 4  | 1  | a2:C27-N4-Fe   |
| 2 | 1  | 5  | 30 | a2:Fe-N5-C30   |
| 2 | 5  | 30 | 31 | a2:N5-C30-C31  |
| 2 | 30 | 31 | 33 | a2:C30-C31-C33 |
| 2 | 31 | 33 | 35 | a2:C31-C33-C35 |
| 2 | 33 | 35 | 5  | a2:C33-C35-N5  |
| 2 | 35 | 5  | 1  | a2:C35-N5-Fe   |
| 2 | 11 | 12 | 14 | a3:C11-M12-C14 |
| 2 | 19 | 20 | 22 | a3:C19-M20-C22 |
| 2 | 27 | 28 | 30 | a3:C27-M28-C30 |
| 2 | 35 | 36 | 6  | a3:C35-M36-C6  |
| 2 | 6  | 7  | 8  | a4:C6-C7-H     |
| 2 | 9  | 7  | 8  | a4:C9-C7-H     |
| 2 | 7  | 9  | 10 | a4:C7-C9-H     |
| 2 | 11 | 9  | 10 | a4:C11-C9-H    |
| 2 | 14 | 15 | 16 | a4:C14-C15-H   |
| 2 | 17 | 15 | 16 | a4:C17-C15-H   |
| 2 | 15 | 17 | 18 | a4:C15-C17-H   |
| 2 | 19 | 17 | 18 | a4:C19-C17-H   |
| 2 | 22 | 23 | 24 | a4:C22-C23-H   |
| 2 | 25 | 23 | 24 | a4:C25-C23-H   |
| 2 | 23 | 25 | 26 | a4:C23-C25-H   |
| 2 | 27 | 25 | 26 | a4:C27-C25-H   |
| 2 | 30 | 31 | 32 | a4:C30-C31-H   |
| 2 | 33 | 31 | 32 | a4:C33-C31-H   |
| 2 | 31 | 33 | 34 | a4:C31-C33-H   |
| 2 | 35 | 33 | 34 | a4:C35-C33-H   |
| 2 | 11 | 12 | 13 | a5:C11-M12-H   |
| 2 | 14 | 12 | 13 | a5:C14-M12-H   |
| 2 | 19 | 20 | 21 | a5:C19-M20-H   |
| 2 | 22 | 20 | 21 | a5:C22-M20-H   |
| 2 | 27 | 28 | 29 | a5:C27-M28-H   |

|    |    |    |    |    |              |
|----|----|----|----|----|--------------|
| 2  | 30 | 28 | 29 |    | a5:C30-M28-H |
| 2  | 35 | 36 | 37 |    | a5:C35-M36-H |
| 2  | 6  | 36 | 37 |    | a5:C6-M36-H  |
| 3  | 1  | 2  | 6  | 11 | g:Pyrr       |
| 3  | 36 | 6  | 7  | 2  | g:Pyrr       |
| 3  | 8  | 7  | 9  | 6  | g:Pyrr       |
| 3  | 10 | 9  | 11 | 7  | g:Pyrr       |
| 3  | 12 | 11 | 2  | 9  | g:Pyrr       |
| 3  | 1  | 3  | 14 | 19 | g:Pyrr       |
| 3  | 12 | 14 | 15 | 3  | g:Pyrr       |
| 3  | 16 | 15 | 17 | 14 | g:Pyrr       |
| 3  | 18 | 17 | 19 | 15 | g:Pyrr       |
| 3  | 20 | 19 | 3  | 17 | g:Pyrr       |
| 3  | 1  | 4  | 22 | 27 | g:Pyrr       |
| 3  | 20 | 22 | 23 | 4  | g:Pyrr       |
| 3  | 24 | 23 | 25 | 22 | g:Pyrr       |
| 3  | 26 | 25 | 27 | 23 | g:Pyrr       |
| 3  | 28 | 27 | 4  | 25 | g:Pyrr       |
| 3  | 1  | 5  | 30 | 35 | g:Pyrr       |
| 3  | 28 | 30 | 31 | 5  | g:Pyrr       |
| 3  | 32 | 31 | 33 | 30 | g:Pyrr       |
| 3  | 34 | 33 | 35 | 31 | g:Pyrr       |
| 3  | 36 | 35 | 5  | 33 | g:Pyrr       |
| 3  | 13 | 12 | 14 | 11 | g:Meth       |
| 3  | 21 | 20 | 22 | 19 | g:Meth       |
| 3  | 29 | 28 | 30 | 27 | g:Meth       |
| 3  | 37 | 36 | 6  | 35 | g:Meth       |
| 4  | 4  | 1  | 38 | 1  | t:Fe-N(O)    |
| 2  | 3  | 4  | 5  |    |              |
| 39 |    |    |    |    |              |
| 4  | 2  | 2  | 6  | 2  | t:N-C        |
| 1  | 11 |    |    |    |              |
| 7  | 36 |    |    |    |              |
| 4  | 2  | 6  | 7  | 2  | t:C-C(H)     |
| 2  | 36 |    |    |    |              |
| 8  | 9  |    |    |    |              |
| 4  | 2  | 7  | 9  | 2  | t:(H)C-C(H)  |
| 6  | 8  |    |    |    |              |
| 10 | 11 |    |    |    |              |
| 4  | 2  | 9  | 11 | 2  | t:C(H)-C     |
| 7  | 10 |    |    |    |              |
| 2  | 12 |    |    |    |              |
| 4  | 2  | 11 | 2  | 2  | t:C-N        |
| 9  | 12 |    |    |    |              |
| 1  | 6  |    |    |    |              |
| 4  | 2  | 3  | 14 | 2  | t:N-C        |
| 1  | 19 |    |    |    |              |
| 12 | 15 |    |    |    |              |
| 4  | 2  | 14 | 15 | 2  | t:C-C(H)     |
| 3  | 12 |    |    |    |              |
| 16 | 17 |    |    |    |              |
| 4  | 2  | 15 | 17 | 2  | t:(H)C-C(H)  |
| 14 | 16 |    |    |    |              |
| 18 | 19 |    |    |    |              |
| 4  | 2  | 17 | 19 | 2  | t:C(H)-C     |
| 15 | 18 |    |    |    |              |
| 3  | 20 |    |    |    |              |

|    |    |    |    |   |             |
|----|----|----|----|---|-------------|
| 4  | 2  | 19 | 3  | 2 | t:C-N       |
| 17 | 20 |    |    |   |             |
| 1  | 14 |    |    |   |             |
| 4  | 2  | 4  | 22 | 2 | t:N-C       |
| 1  | 27 |    |    |   |             |
| 20 | 23 |    |    |   |             |
| 4  | 2  | 22 | 23 | 2 | t:C-C(H)    |
| 4  | 20 |    |    |   |             |
| 24 | 25 |    |    |   |             |
| 4  | 2  | 23 | 25 | 2 | t:(H)C-C(H) |
| 22 | 24 |    |    |   |             |
| 26 | 27 |    |    |   |             |
| 4  | 2  | 25 | 27 | 2 | t:C(H)-C    |
| 23 | 26 |    |    |   |             |
| 4  | 28 |    |    |   |             |
| 4  | 2  | 27 | 4  | 2 | t:C-N       |
| 25 | 28 |    |    |   |             |
| 1  | 22 |    |    |   |             |
| 4  | 2  | 5  | 30 | 2 | t:N-C       |
| 1  | 35 |    |    |   |             |
| 28 | 31 |    |    |   |             |
| 4  | 2  | 30 | 31 | 2 | t:C-C(H)    |
| 5  | 28 |    |    |   |             |
| 32 | 33 |    |    |   |             |
| 4  | 2  | 31 | 33 | 2 | t:(H)C-C(H) |
| 30 | 32 |    |    |   |             |
| 34 | 35 |    |    |   |             |
| 4  | 2  | 33 | 35 | 2 | t:C(H)-C    |
| 31 | 34 |    |    |   |             |
| 5  | 36 |    |    |   |             |
| 4  | 2  | 35 | 5  | 2 | t:C-N       |
| 33 | 36 |    |    |   |             |
| 1  | 30 |    |    |   |             |
| 4  | 2  | 11 | 12 | 2 | t:(H)C-M(H) |
| 2  | 9  |    |    |   |             |
| 13 | 14 |    |    |   |             |
| 4  | 2  | 12 | 14 | 2 | t:(H)M-C(H) |
| 11 | 13 |    |    |   |             |
| 3  | 15 |    |    |   |             |
| 4  | 2  | 19 | 20 | 2 | t:(H)C-M(H) |
| 3  | 17 |    |    |   |             |
| 21 | 22 |    |    |   |             |
| 4  | 2  | 20 | 22 | 2 | t:(H)M-C(H) |
| 19 | 21 |    |    |   |             |
| 4  | 23 |    |    |   |             |
| 4  | 2  | 27 | 28 | 2 | t:(H)C-M(H) |
| 4  | 25 |    |    |   |             |
| 29 | 30 |    |    |   |             |
| 4  | 2  | 28 | 30 | 2 | t:(H)M-C(H) |
| 27 | 29 |    |    |   |             |
| 5  | 31 |    |    |   |             |
| 4  | 2  | 35 | 36 | 2 | t:(H)C-M(H) |
| 5  | 33 |    |    |   |             |
| 6  | 37 |    |    |   |             |
| 4  | 2  | 36 | 6  | 2 | t:(H)M-C(H) |
| 35 | 37 |    |    |   |             |
| 2  | 7  |    |    |   |             |

|   |    |    |    |              |
|---|----|----|----|--------------|
| 1 | 8  | 40 |    | R:C8-H       |
| 1 | 8  | 41 |    | R:C8-H       |
| 1 | 8  | 42 |    | R:C8-C42     |
| 1 | 42 | 43 |    | R:C42-H      |
| 1 | 42 | 44 |    | R:C42-H      |
| 1 | 42 | 45 |    | R:C42-H      |
| 1 | 10 | 46 |    | R:C10-H      |
| 1 | 10 | 47 |    | R:C10-H      |
| 1 | 10 | 48 |    | R:C10-C48    |
| 1 | 48 | 49 |    | R:C48-H      |
| 1 | 48 | 50 |    | R:C48-H      |
| 1 | 48 | 51 |    | R:C48-H      |
| 1 | 16 | 52 |    | R:C16-H      |
| 1 | 16 | 53 |    | R:C16-H      |
| 1 | 16 | 54 |    | R:C16-C54    |
| 1 | 54 | 55 |    | R:C54-H      |
| 1 | 54 | 56 |    | R:C54-H      |
| 1 | 54 | 57 |    | R:C54-H      |
| 1 | 18 | 58 |    | R:C18-H      |
| 1 | 18 | 59 |    | R:C18-H      |
| 1 | 18 | 60 |    | R:C18-C60    |
| 1 | 60 | 61 |    | R:C60-H      |
| 1 | 60 | 62 |    | R:C60-H      |
| 1 | 60 | 63 |    | R:C60-H      |
| 1 | 24 | 64 |    | R:C24-H      |
| 1 | 24 | 65 |    | R:C24-H      |
| 1 | 24 | 66 |    | R:C24-C66    |
| 1 | 66 | 67 |    | R:C66-H      |
| 1 | 66 | 68 |    | R:C66-H      |
| 1 | 66 | 69 |    | R:C66-H      |
| 1 | 26 | 70 |    | R:C26-H      |
| 1 | 26 | 71 |    | R:C26-H      |
| 1 | 26 | 72 |    | R:C26-C72    |
| 1 | 72 | 73 |    | R:C72-H      |
| 1 | 72 | 74 |    | R:C72-H      |
| 1 | 72 | 75 |    | R:C72-H      |
| 1 | 32 | 76 |    | R:C32-H      |
| 1 | 32 | 77 |    | R:C32-H      |
| 1 | 32 | 78 |    | R:C32-C78    |
| 1 | 78 | 79 |    | R:C78-H      |
| 1 | 78 | 80 |    | R:C78-H      |
| 1 | 78 | 81 |    | R:C78-H      |
| 1 | 34 | 82 |    | R:C34-H      |
| 1 | 34 | 83 |    | R:C34-H      |
| 1 | 34 | 84 |    | R:C34-C84    |
| 1 | 84 | 85 |    | R:C84-H      |
| 1 | 84 | 86 |    | R:C84-H      |
| 1 | 84 | 87 |    | R:C84-H      |
| 2 | 7  | 8  | 40 | A6:C7-C8-H   |
| 2 | 7  | 8  | 41 | a6:C7-C8-H   |
| 2 | 7  | 8  | 42 | a6:C7-C8-C42 |
| 2 | 40 | 8  | 42 | a6:H-C8-C42* |
| 2 | 41 | 8  | 42 | a6:H-C8-C42* |
| 2 | 8  | 42 | 43 | a6:C8-C42-H  |
| 2 | 8  | 42 | 44 | a6:C8-C42-H  |
| 2 | 8  | 42 | 45 | a6:C8-C42-H  |
| 2 | 43 | 42 | 44 | a6:H-C42-H   |

|   |    |    |    |                |
|---|----|----|----|----------------|
| 2 | 43 | 42 | 45 | a6:H-C42-H     |
| 2 | 44 | 42 | 45 | a6:H-C42-H     |
| 2 | 9  | 10 | 46 | A6:C9-C10-H    |
| 2 | 9  | 10 | 47 | a6:C9-C10-H    |
| 2 | 9  | 10 | 48 | a6:C9-C10-C48  |
| 2 | 46 | 10 | 48 | a6:H-C10-C48*  |
| 2 | 47 | 10 | 48 | a6:H-C10-C48*  |
| 2 | 10 | 48 | 49 | a6:C10-C48-H   |
| 2 | 10 | 48 | 50 | a6:C10-C48-H   |
| 2 | 10 | 48 | 51 | a6:C10-C48-H   |
| 2 | 49 | 48 | 50 | a6:H-C48-H     |
| 2 | 49 | 48 | 51 | a6:H-C48-H     |
| 2 | 50 | 48 | 51 | a6:H-C48-H     |
| 2 | 15 | 16 | 52 | A6:C15-C16-H   |
| 2 | 15 | 16 | 53 | a6:C15-C16-H   |
| 2 | 15 | 16 | 54 | a6:C15-C16-C54 |
| 2 | 52 | 16 | 54 | a6:H-C16-C54*  |
| 2 | 53 | 16 | 54 | a6:H-C16-C54*  |
| 2 | 16 | 54 | 55 | a6:C16-C54-H   |
| 2 | 16 | 54 | 56 | a6:C16-C54-H   |
| 2 | 16 | 54 | 57 | a6:C16-C54-H   |
| 2 | 55 | 54 | 56 | a6:H-C54-H     |
| 2 | 55 | 54 | 57 | a6:H-C54-H     |
| 2 | 56 | 54 | 57 | a6:H-C54-H     |
| 2 | 17 | 18 | 58 | A6:C17-C18-H   |
| 2 | 17 | 18 | 59 | a6:C17-C18-H   |
| 2 | 17 | 18 | 60 | a6:C17-C18-C60 |
| 2 | 58 | 18 | 60 | a6:H-C18-C60*  |
| 2 | 59 | 18 | 60 | a6:H-C18-C60*  |
| 2 | 18 | 60 | 61 | a6:C18-C60-H   |
| 2 | 18 | 60 | 62 | a6:C18-C60-H   |
| 2 | 18 | 60 | 63 | a6:C18-C60-H   |
| 2 | 61 | 60 | 62 | a6:H-C60-H     |
| 2 | 61 | 60 | 63 | a6:H-C60-H     |
| 2 | 62 | 60 | 63 | a6:H-C60-H     |
| 2 | 23 | 24 | 64 | A6:C23-C24-H   |
| 2 | 23 | 24 | 65 | a6:C23-C24-H   |
| 2 | 23 | 24 | 66 | a6:C23-C24-C66 |
| 2 | 64 | 24 | 66 | a6:H-C24-C66*  |
| 2 | 65 | 24 | 66 | a6:H-C24-C66*  |
| 2 | 24 | 66 | 67 | a6:C24-C66-H   |
| 2 | 24 | 66 | 68 | a6:C24-C66-H   |
| 2 | 24 | 66 | 69 | a6:C24-C66-H   |
| 2 | 67 | 66 | 68 | a6:H-C66-H     |
| 2 | 67 | 66 | 69 | a6:H-C66-H     |
| 2 | 68 | 66 | 69 | a6:H-C66-H     |
| 2 | 25 | 26 | 70 | A6:C25-C26-H   |
| 2 | 25 | 26 | 71 | a6:C25-C26-H   |
| 2 | 25 | 26 | 72 | a6:C25-C26-C72 |
| 2 | 70 | 26 | 72 | a6:H-C26-C72*  |
| 2 | 71 | 26 | 72 | a6:H-C26-C72*  |
| 2 | 26 | 72 | 73 | a6:C26-C72-H   |
| 2 | 26 | 72 | 74 | a6:C26-C72-H   |
| 2 | 26 | 72 | 75 | a6:C26-C72-H   |
| 2 | 73 | 72 | 74 | a6:H-C72-H     |
| 2 | 73 | 72 | 75 | a6:H-C72-H     |
| 2 | 74 | 72 | 75 | a6:H-C72-H     |

|    |    |    |    |   |                |
|----|----|----|----|---|----------------|
| 2  | 31 | 32 | 76 |   | A6:C31-C32-H   |
| 2  | 31 | 32 | 77 |   | a6:C31-C32-H   |
| 2  | 31 | 32 | 78 |   | a6:C31-C32-C78 |
| 2  | 76 | 32 | 78 |   | a6:H-C32-C78*  |
| 2  | 77 | 32 | 78 |   | a6:H-C32-C78*  |
| 2  | 32 | 78 | 79 |   | a6:C32-C78-H   |
| 2  | 32 | 78 | 80 |   | a6:C32-C78-H   |
| 2  | 32 | 78 | 81 |   | a6:C32-C78-H   |
| 2  | 79 | 78 | 80 |   | a6:H-C78-H     |
| 2  | 79 | 78 | 81 |   | a6:H-C78-H     |
| 2  | 80 | 78 | 81 |   | a6:H-C78-H     |
| 2  | 33 | 34 | 82 |   | A6:C33-C34-H   |
| 2  | 33 | 34 | 83 |   | a6:C33-C34-H   |
| 2  | 33 | 34 | 84 |   | a6:C33-C34-C84 |
| 2  | 82 | 34 | 84 |   | a6:H-C34-C84*  |
| 2  | 83 | 34 | 84 |   | a6:H-C34-C84*  |
| 2  | 34 | 84 | 85 |   | a6:C34-C84-H   |
| 2  | 34 | 84 | 86 |   | a6:C34-C84-H   |
| 2  | 34 | 84 | 87 |   | a6:C34-C84-H   |
| 2  | 85 | 84 | 86 |   | a6:H-C84-H     |
| 2  | 85 | 84 | 87 |   | a6:H-C84-H     |
| 2  | 86 | 84 | 87 |   | a6:H-C84-H     |
| 4  | 2  | 7  | 8  | 3 | T:C-Et         |
| 6  | 9  |    |    |   |                |
| 40 | 41 | 42 |    |   |                |
| 4  | 3  | 8  | 42 | 3 | t:Et-Et        |
| 7  | 40 | 41 |    |   |                |
| 43 | 44 | 45 |    |   |                |
| 4  | 2  | 9  | 10 | 3 | t:C-Et         |
| 7  | 11 |    |    |   |                |
| 46 | 47 | 48 |    |   |                |
| 4  | 3  | 10 | 48 | 3 | t:Et-Et        |
| 9  | 46 | 47 |    |   |                |
| 49 | 50 | 51 |    |   |                |
| 4  | 2  | 15 | 16 | 3 | T:C-Et         |
| 14 | 17 |    |    |   |                |
| 52 | 53 | 54 |    |   |                |
| 4  | 3  | 16 | 54 | 3 | t:Et-Et        |
| 15 | 52 | 53 |    |   |                |
| 55 | 56 | 57 |    |   |                |
| 4  | 2  | 17 | 18 | 3 | t:C-Et         |
| 15 | 19 |    |    |   |                |
| 58 | 59 | 60 |    |   |                |
| 4  | 3  | 18 | 60 | 3 | t:Et-Et        |
| 17 | 58 | 59 |    |   |                |
| 61 | 62 | 63 |    |   |                |
| 4  | 2  | 23 | 24 | 3 | T:C-Et         |
| 22 | 25 |    |    |   |                |
| 64 | 65 | 66 |    |   |                |
| 4  | 3  | 24 | 66 | 3 | t:Et-Et        |
| 23 | 64 | 65 |    |   |                |
| 67 | 68 | 69 |    |   |                |
| 4  | 2  | 25 | 26 | 3 | t:C-Et         |
| 23 | 27 |    |    |   |                |
| 70 | 71 | 72 |    |   |                |
| 4  | 3  | 26 | 72 | 3 | t:Et-Et        |
| 25 | 70 | 71 |    |   |                |

|    |    |    |    |   |  |         |
|----|----|----|----|---|--|---------|
| 73 | 74 | 75 |    |   |  |         |
| 4  | 2  | 31 | 32 | 3 |  | T:C-Et  |
| 30 | 33 |    |    |   |  |         |
| 76 | 77 | 78 |    |   |  |         |
| 4  | 3  | 32 | 78 | 3 |  | t:Et-Et |
| 31 | 76 | 77 |    |   |  |         |
| 79 | 80 | 81 |    |   |  |         |
| 4  | 2  | 33 | 34 | 3 |  | t:C-Et  |
| 31 | 35 |    |    |   |  |         |
| 82 | 83 | 84 |    |   |  |         |
| 4  | 3  | 34 | 84 | 3 |  | t:Et-Et |
| 33 | 82 | 83 |    |   |  |         |
| 85 | 86 | 87 |    |   |  |         |



**Table S20.** Cartesian coordinates of the fully optimized structure of [Fe(P)(NO)] (P = porphine<sup>2-</sup>) using BP86/LanL2DZ\*.

|    |             |             |             |
|----|-------------|-------------|-------------|
| Fe | -0.02494400 | 0.00042600  | 0.07906100  |
| N  | -1.33674300 | 1.53898100  | -0.15804700 |
| N  | -1.58485000 | -1.29163600 | -0.14957700 |
| N  | 1.23529100  | -1.52988600 | -0.22741900 |
| N  | 1.47990500  | 1.28528800  | -0.22947600 |
| C  | -1.04314900 | 2.89392100  | -0.19833600 |
| C  | -2.25563500 | 3.69236100  | -0.20441000 |
| H  | -2.28231800 | 4.78626200  | -0.24380700 |
| C  | -3.30728200 | 2.80310000  | -0.16030900 |
| H  | -4.38240600 | 3.01071900  | -0.15708000 |
| C  | -2.72260200 | 1.47405400  | -0.13061900 |
| C  | -3.48002200 | 0.29940400  | -0.09768300 |
| H  | -4.57270900 | 0.39539200  | -0.07555700 |
| C  | -2.93829900 | -0.98930200 | -0.12291000 |
| C  | -3.74340400 | -2.19779300 | -0.14609100 |
| H  | -4.83819500 | -2.21760300 | -0.14161400 |
| C  | -2.86044700 | -3.25497200 | -0.18682900 |
| H  | -3.07489400 | -4.32815300 | -0.22189400 |
| C  | -1.52858100 | -2.67690100 | -0.18504600 |
| C  | -0.35367400 | -3.43396200 | -0.22388600 |
| H  | -0.44625900 | -4.52687500 | -0.24639400 |
| C  | 0.93198700  | -2.88776100 | -0.24978400 |
| C  | 2.14086100  | -3.68663400 | -0.31597500 |
| H  | 2.16134200  | -4.78057400 | -0.35722500 |
| C  | 3.19784600  | -2.80227800 | -0.32102900 |
| H  | 4.27081200  | -3.01499700 | -0.36905000 |
| C  | 2.62326600  | -1.47178100 | -0.26295400 |
| C  | 3.38243900  | -0.29861600 | -0.26396100 |
| H  | 4.47495200  | -0.39363200 | -0.28972900 |
| C  | 2.83728700  | 0.98796300  | -0.26352900 |
| C  | 3.63303200  | 2.19875800  | -0.32441800 |
| H  | 4.72665700  | 2.22278300  | -0.37119700 |
| C  | 2.74498200  | 3.25276500  | -0.32381600 |
| H  | 2.95429200  | 4.32655500  | -0.36870800 |
| C  | 1.41628300  | 2.67550500  | -0.25725000 |
| C  | 0.24479900  | 3.43643900  | -0.23673100 |
| H  | 0.34291500  | 4.52875900  | -0.26321400 |
| N  | 0.18324200  | -0.00575700 | 1.75452900  |
| O  | 0.99478700  | -0.01053300 | 2.62165200  |

**Table S21.** Cartesian coordinates of the fully optimized structure of [Fe(P)(NO)] (P = porphine<sup>2-</sup>) using BP86/6-31G\*.

|    |             |             |             |
|----|-------------|-------------|-------------|
| Fe | 0.02580900  | 0.00001300  | 0.07366400  |
| N  | 1.46324000  | -1.40611300 | -0.14735400 |
| N  | 1.45115600  | 1.41814800  | -0.14775400 |
| N  | -1.36055100 | 1.39881800  | -0.23007200 |
| N  | -1.34863500 | -1.41070900 | -0.22998300 |
| C  | 1.29768100  | -2.78203900 | -0.21236700 |
| C  | 2.57433200  | -3.46091100 | -0.21155600 |
| H  | 2.70020200  | -4.54369100 | -0.26579600 |
| C  | 3.53440700  | -2.48699100 | -0.13688900 |
| H  | 4.62021500  | -2.59649000 | -0.11916600 |
| C  | 2.83750500  | -1.22012500 | -0.09953800 |
| C  | 3.47898500  | 0.01460400  | -0.05538800 |
| H  | 4.57296300  | 0.01931400  | -0.01732900 |
| C  | 2.82697800  | 1.24378900  | -0.09995700 |
| C  | 3.51312900  | 2.51650300  | -0.13773000 |
| H  | 4.59797300  | 2.63518300  | -0.12011700 |
| C  | 2.54485200  | 3.48224500  | -0.21258700 |
| H  | 2.66154000  | 4.56604000  | -0.26711700 |
| C  | 1.27399400  | 2.79261300  | -0.21309500 |
| C  | 0.04025600  | 3.43464900  | -0.27157400 |
| H  | 0.03390000  | 4.52836000  | -0.31476300 |
| C  | -1.18652700 | 2.77887400  | -0.27785100 |
| C  | -2.46062600 | 3.45746300  | -0.33487900 |
| H  | -2.58096600 | 4.54069400  | -0.39213800 |
| C  | -3.42672900 | 2.48688100  | -0.30348100 |
| H  | -4.51177000 | 2.60046500  | -0.33288100 |
| C  | -2.73853800 | 1.21834500  | -0.23796700 |
| C  | -3.38303800 | -0.01455100 | -0.22138000 |
| H  | -4.47748900 | -0.01920800 | -0.22684900 |
| C  | -2.72809800 | -1.24193600 | -0.23807700 |
| C  | -3.40549400 | -2.51628900 | -0.30357400 |
| H  | -4.48952500 | -2.63909800 | -0.33313200 |
| C  | -2.43117100 | -3.47862100 | -0.33467600 |
| H  | -2.54227400 | -4.56284700 | -0.39179900 |
| C  | -1.16288800 | -2.78921600 | -0.27752300 |
| C  | 0.06943200  | -3.43452500 | -0.27090200 |
| H  | 0.07241100  | -4.52826100 | -0.31387700 |
| N  | -0.17747800 | -0.00029800 | 1.74738100  |
| O  | -0.99162400 | -0.00053500 | 2.61751600  |

**Table S22.** Cartesian coordinates of the fully optimized structure of [Fe(P)(NO)] (P = porphine<sup>2-</sup>) using BP86/6-311G\*.

|    |             |             |             |
|----|-------------|-------------|-------------|
| Fe | 0.02671300  | -0.00000700 | 0.06803600  |
| N  | 1.46129700  | -1.41542900 | -0.14718200 |
| N  | 1.46083700  | 1.41590400  | -0.14721900 |
| N  | -1.35946700 | 1.40837100  | -0.22614800 |
| N  | -1.35901700 | -1.40878600 | -0.22623300 |
| C  | 1.28591600  | -2.78699200 | -0.21299800 |
| C  | 2.55972600  | -3.46887600 | -0.21119300 |
| H  | 2.68605800  | -4.55036600 | -0.26573200 |
| C  | 3.52181800  | -2.50107200 | -0.13572600 |
| H  | 4.60539300  | -2.62010200 | -0.11759400 |
| C  | 2.83256400  | -1.23127300 | -0.09829000 |
| C  | 3.47624400  | 0.00056000  | -0.05469800 |
| H  | 4.56907900  | 0.00073900  | -0.01656800 |
| C  | 2.83216600  | 1.23218300  | -0.09836600 |
| C  | 3.52102000  | 2.50219500  | -0.13589100 |
| H  | 4.60455700  | 2.62156700  | -0.11779700 |
| C  | 2.55862200  | 3.46969200  | -0.21138600 |
| H  | 2.68461300  | 4.55121900  | -0.26598800 |
| C  | 1.28502600  | 2.78740900  | -0.21309100 |
| C  | 0.05401600  | 3.43128600  | -0.27194100 |
| H  | 0.05216800  | 4.52379100  | -0.31695500 |
| C  | -1.17547300 | 2.78366100  | -0.27743200 |
| C  | -2.44662100 | 3.46530200  | -0.33535400 |
| H  | -2.56720400 | 4.54716900  | -0.39455200 |
| C  | -3.41493100 | 2.50098400  | -0.30219100 |
| H  | -4.49770900 | 2.62404400  | -0.33163200 |
| C  | -2.73455500 | 1.22969100  | -0.23405900 |
| C  | -3.38102900 | -0.00053000 | -0.21767000 |
| H  | -4.47433100 | -0.00070400 | -0.22339800 |
| C  | -2.73416200 | -1.23054300 | -0.23418700 |
| C  | -3.41412900 | -2.50204900 | -0.30241200 |
| H  | -4.49686600 | -2.62545300 | -0.33191500 |
| C  | -2.44551100 | -3.46605900 | -0.33555400 |
| H  | -2.56575300 | -4.54796100 | -0.39479000 |
| C  | -1.17458300 | -2.78401900 | -0.27753700 |
| C  | 0.05511200  | -3.43125400 | -0.27193800 |
| H  | 0.05361100  | -4.52376000 | -0.31693200 |
| N  | -0.17747400 | -0.00006200 | 1.75105200  |
| O  | -0.98735300 | -0.00022000 | 2.61081500  |

**Table S23.** Cartesian coordinates of the fully optimized structure of [Fe(P)(NO)] (P = porphine<sup>2-</sup>) using BP86/TZVP [Praneeth, V. K. K.; Neese, F.; Lehnert, N. *Inorg. Chem.* **2005**, *44*, 2570-2572].

|    |           |           |           |
|----|-----------|-----------|-----------|
| Fe | 0.026411  | 0.000294  | 0.089784  |
| N  | 1.527839  | -1.350679 | -0.151542 |
| N  | 1.396344  | 1.482247  | -0.156643 |
| N  | -1.425869 | 1.344832  | -0.228134 |
| N  | -1.295755 | -1.474373 | -0.228719 |
| C  | 1.411306  | -2.726598 | -0.192501 |
| C  | 2.714102  | -3.347471 | -0.198612 |
| H  | 2.888498  | -4.420646 | -0.240291 |
| C  | 3.630278  | -2.337557 | -0.153917 |
| H  | 4.716196  | -2.406448 | -0.152167 |
| C  | 2.886439  | -1.100745 | -0.122699 |
| C  | 3.469589  | 0.158665  | -0.094830 |
| H  | 4.559729  | 0.209277  | -0.074378 |
| C  | 2.772426  | 1.358518  | -0.129018 |
| C  | 3.399025  | 2.658467  | -0.167089 |
| H  | 4.473955  | 2.827074  | -0.167316 |
| C  | 2.393668  | 3.579522  | -0.213479 |
| H  | 2.468368  | 4.664066  | -0.259043 |
| C  | 1.153552  | 2.841580  | -0.201526 |
| C  | -0.105227 | 3.425117  | -0.241807 |
| H  | -0.157483 | 4.514808  | -0.274638 |
| C  | -1.302561 | 2.724893  | -0.260280 |
| C  | -2.602325 | 3.344888  | -0.331891 |
| H  | -2.771827 | 4.418406  | -0.382830 |
| C  | -3.523004 | 2.337884  | -0.330065 |
| H  | -4.607490 | 2.410290  | -0.379269 |
| C  | -2.787792 | 1.099563  | -0.260552 |
| C  | -3.373526 | -0.158055 | -0.258386 |
| H  | -4.463323 | -0.208309 | -0.286925 |
| C  | -2.674249 | -1.356335 | -0.261935 |
| C  | -3.291736 | -2.657450 | -0.332311 |
| H  | -4.364793 | -2.829986 | -0.382293 |
| C  | -2.281741 | -3.574786 | -0.333425 |
| H  | -2.350951 | -4.659423 | -0.384412 |
| C  | -1.045066 | -2.836960 | -0.260039 |
| C  | 0.211688  | -3.423588 | -0.236502 |
| H  | 0.260060  | -4.513520 | -0.267566 |
| N  | -0.187524 | -0.003513 | 1.780776  |
| O  | -0.971492 | -0.007520 | 2.661471  |

**Table S24.** Cartesian coordinates of the fully optimized structure of [Fe(P)(NO)] (P = porphine<sup>2-</sup>) using B3LYP/LanL2DZ [Praneeth, V. K. K.; Näther, C.; Peters, G.; Lehnert, N. *Inorg. Chem.* **2006**, *45*, 2795-2811].

|    |           |           |           |
|----|-----------|-----------|-----------|
| Fe | 0.022853  | 0.054551  | 0.017189  |
| N  | 0.031498  | 0.032574  | 2.041022  |
| N  | 2.050535  | 0.026275  | 0.042678  |
| N  | 0.070533  | -0.391838 | -1.945225 |
| N  | -1.941365 | -0.380679 | 0.048056  |
| C  | -1.076066 | -0.018100 | 2.887738  |
| C  | -0.663549 | 0.133866  | 4.271680  |
| H  | -1.337353 | 0.122381  | 5.118213  |
| C  | 0.702331  | 0.281578  | 4.266932  |
| H  | 1.368630  | 0.414587  | 5.109108  |
| C  | 1.130085  | 0.219063  | 2.880230  |
| C  | 2.456630  | 0.317558  | 2.469179  |
| H  | 3.213737  | 0.466005  | 3.233615  |
| C  | 2.880801  | 0.214567  | 1.146897  |
| C  | 4.271372  | 0.272222  | 0.731102  |
| H  | 5.108391  | 0.406011  | 1.403697  |
| C  | 4.287080  | 0.118712  | -0.634232 |
| H  | 5.139247  | 0.102034  | -1.300842 |
| C  | 2.905972  | -0.031813 | -1.057207 |
| C  | 2.507770  | -0.218093 | -2.378379 |
| H  | 3.279072  | -0.241291 | -3.142621 |
| C  | 1.187855  | -0.393275 | -2.784133 |
| C  | 0.784070  | -0.618628 | -4.159997 |
| H  | 1.466246  | -0.670549 | -4.998261 |
| C  | -0.583683 | -0.748931 | -4.160939 |
| H  | -1.242748 | -0.929230 | -4.999907 |
| C  | -1.023632 | -0.605863 | -2.785320 |
| C  | -2.351606 | -0.689788 | -2.376559 |
| H  | -3.107444 | -0.855833 | -3.138379 |
| C  | -2.772398 | -0.595560 | -1.053016 |
| C  | -4.152554 | -0.729780 | -0.625544 |
| H  | -4.986410 | -0.907664 | -1.291697 |
| C  | -4.163799 | -0.594456 | 0.741809  |
| H  | -5.008672 | -0.639723 | 1.416280  |
| C  | -2.790853 | -0.374718 | 1.157353  |
| C  | -2.395047 | -0.198457 | 2.480102  |
| H  | -3.164944 | -0.215786 | 3.245869  |
| N  | -0.245339 | 1.755700  | -0.247210 |
| O  | -0.962388 | 2.542673  | -0.826440 |

**Table S25.** Cartesian coordinates of the fully optimized structure of [Fe(P)(NO)] (P = porphine<sup>2-</sup>) using B3LYP/LanL2DZ\*.

|    |             |             |             |
|----|-------------|-------------|-------------|
| Fe | -0.02934000 | 0.00147800  | 0.05991800  |
| N  | -1.26771600 | 1.59657600  | -0.15172100 |
| N  | -1.63935900 | -1.22408100 | -0.14705100 |
| N  | 1.17140500  | -1.58610800 | -0.21644300 |
| N  | 1.53918900  | 1.22241100  | -0.22281900 |
| C  | -0.91127400 | 2.92652500  | -0.18501400 |
| C  | -2.08512300 | 3.77359300  | -0.19425000 |
| H  | -2.06626800 | 4.85940800  | -0.22754700 |
| C  | -3.16798700 | 2.93660100  | -0.16319300 |
| H  | -4.22417200 | 3.19170600  | -0.16599200 |
| C  | -2.64527200 | 1.58646300  | -0.13593500 |
| C  | -3.44665700 | 0.44771200  | -0.11308800 |
| H  | -4.52572100 | 0.58989700  | -0.10065100 |
| C  | -2.96738700 | -0.85993200 | -0.13180000 |
| C  | -3.82047900 | -2.02982400 | -0.15373400 |
| H  | -4.90673000 | -2.00492400 | -0.15555900 |
| C  | -2.98944200 | -3.11753300 | -0.18092400 |
| H  | -3.25054200 | -4.17182900 | -0.20969200 |
| C  | -1.63715700 | -2.60081600 | -0.17461900 |
| C  | -0.49802200 | -3.40183300 | -0.20378000 |
| H  | -0.63678700 | -4.48122400 | -0.22044800 |
| C  | 0.80681200  | -2.91787400 | -0.23214300 |
| C  | 1.97727300  | -3.76535500 | -0.29841700 |
| H  | 1.95340200  | -4.85105500 | -0.33182200 |
| C  | 3.06384400  | -2.93244200 | -0.31651400 |
| H  | 4.11766700  | -3.19160100 | -0.36910600 |
| C  | 2.54962300  | -1.58143600 | -0.26304400 |
| C  | 3.35230500  | -0.44398100 | -0.27450100 |
| H  | 4.43081800  | -0.58519300 | -0.30981700 |
| C  | 2.86975300  | 0.86193200  | -0.26833600 |
| C  | 3.71503600  | 2.03398800  | -0.32737700 |
| H  | 4.80004800  | 2.01243800  | -0.37949400 |
| C  | 2.88035000  | 3.11943100  | -0.31374200 |
| H  | 3.13739600  | 4.17440500  | -0.35175200 |
| C  | 1.53112800  | 2.60322700  | -0.24456700 |
| C  | 0.39539800  | 3.40740700  | -0.21799400 |
| H  | 0.53887000  | 4.48607200  | -0.23940600 |
| N  | 0.15397900  | -0.01144800 | 1.76174300  |
| O  | 0.98200500  | -0.04038400 | 2.58691200  |

**Table S26.** Cartesian coordinates of the fully optimized structure of [Fe(P)(NO)] (P = porphine<sup>2-</sup>) using B3LYP/TZVP.

|    |             |             |             |
|----|-------------|-------------|-------------|
| Fe | 0.02828500  | 0.00051600  | 0.08013300  |
| N  | 1.66199200  | -1.19352900 | -0.14426000 |
| N  | 1.23858000  | 1.61545100  | -0.15390700 |
| N  | -1.55868000 | 1.18940700  | -0.22626300 |
| N  | -1.14008000 | -1.60794500 | -0.21802200 |
| C  | 1.68050800  | -2.56372000 | -0.18974600 |
| C  | 3.03723400  | -3.04653700 | -0.19459700 |
| H  | 3.32002000  | -4.08707400 | -0.23655200 |
| C  | 3.84038500  | -1.95508400 | -0.14495300 |
| H  | 4.91873700  | -1.91526400 | -0.13857600 |
| C  | 2.97613900  | -0.80324500 | -0.11367800 |
| C  | 3.42111300  | 0.50658300  | -0.08603800 |
| H  | 4.49134700  | 0.66808300  | -0.06352600 |
| C  | 2.61024800  | 1.62673100  | -0.12251600 |
| C  | 3.09901200  | 2.98106300  | -0.16306000 |
| H  | 4.14193100  | 3.25813500  | -0.15826000 |
| C  | 2.01183800  | 3.78931800  | -0.21870100 |
| H  | 1.97795100  | 4.86674200  | -0.26757600 |
| C  | 0.85564000  | 2.93111500  | -0.20830600 |
| C  | -0.45290600 | 3.37761500  | -0.25582500 |
| H  | -0.61498700 | 4.44712400  | -0.29578700 |
| C  | -1.57065400 | 2.56408000  | -0.26999000 |
| C  | -2.92427500 | 3.04562700  | -0.34113300 |
| H  | -3.20264500 | 4.08669500  | -0.39640000 |
| C  | -3.73198800 | 1.95615900  | -0.32927000 |
| H  | -4.80949900 | 1.91937400  | -0.37370400 |
| C  | -2.87614900 | 0.80231300  | -0.25604800 |
| C  | -3.32520100 | -0.50572600 | -0.24997200 |
| H  | -4.39535900 | -0.66585200 | -0.27566100 |
| C  | -2.51272600 | -1.62489500 | -0.24990300 |
| C  | -2.99222200 | -2.98001600 | -0.31524100 |
| H  | -4.03298400 | -3.26132300 | -0.36051500 |
| C  | -1.90016300 | -3.78398300 | -0.31948800 |
| H  | -1.86048500 | -4.86124400 | -0.36729400 |
| C  | -0.74747800 | -2.92527100 | -0.25178100 |
| C  | 0.55998300  | -3.37431400 | -0.23308900 |
| H  | 0.71875400  | -4.44461500 | -0.26576100 |
| N  | -0.17421100 | -0.00937700 | 1.78629100  |
| O  | -0.99142300 | -0.01114000 | 2.61116200  |
